# Supplementary material for: A resequencing pathogen microarray method for high-throughput molecular diagnosis of multiple etiologies associated with central nervous system infection
Source: Springer Nature journal article supplement (doi:10.1007/s00705-017-3550-7), 2017-09-14
Supplement: MOESM1 [file 15058908]

## Sheet: Primers
ENTB_KLPN_FUMC_F	CTCCGGCACCCAAAGCAAT	ENTB_KLPN_FUMC_R	GTGCTTCAGGCTATGGTCCAG
STAP_STAU_AROE_F1	AGAATTAGATGGCTTTAATATCACAAT	STAP_STAU_AROE_R1	GCCATCGTTCTATTCGCAAC
STRE_STPY_GKI_F	AAAGAAACCCAAGAAGTCGG	STRE_STPY_GKI_R	CTTTGATGGCTGAATCCCCTT
STRE_STPY_SPEB_F	TAGGTCAACATGCAGCTACAGGAT	STRE_STPY_SPEB_R	GTCCGCCTACTTTACCGACACC
ENTB_ESCO_STX1_F	GTGACAGTAGCTATACCACGTT	ENTB_ESCO_STX1_R	TTTTTCATTTTACCCCCTCA
ENTB_ESCO_TRPA_F	GCTCCTGCATCAATCGC	ENTB_ESCO_TRPA_R	CCCTTCTCCGACCCACT
ENTB_SAEN_GYRB_F	CATTTCCACTACGAAGGC	ENTB_SAEN_GYRB_R	TTCGTTCATCTGCTGTTC
ENTB_SHSP_GYRB_F	CGGCGTTTCCATTCGTCT	ENTB_SHSP_GYRB_R	AGCATCGATAATTTTGCCAACCAC
LIST_LIMO_GYRB_F	AACTTTACATCGTTGAGGGTGA	LIST_LIMO_GYRB_R	ACCTTTATATCGTTGAATGCTGT
STAP_STAU_TSTX_F	TTTTCCGAGTCCTTATTATAGCC	STAP_STAU_TSTX_R	TTTCCAATAACCACCCGTTT
MYCB_MYSP_GYRB_F	CACATCAACCGSACCAAGAACGC	MYCB_MYSP_GYRB_R	TCTTGGTCTGGCCCTCGAAC
MYCB_MYTU_PNCA_F	TGACCACTTCTCCGGCACACC	MYCB_MYTU_PNCA_R	CACACCCGCTGTCAGGTCCAC
NEIS_NEME_PORB_F	TTCAAAGGCCAAGAAGACCTC	NEIS_NEME_PORB_R	GTAACCGCTGACCAAACG
NEIS_NESP_GYRA_F	GCTATCTCGACTACGCCATGAGC	NEIS_NESP_GYRA_R	TAACGGTTTCTTCCTCAATGTCTGCC
PAST_HAIN_ADK_F1	ATTAGTACCAGATGAATTAACCGTTG	PAST_HAIN_ADK_R1	AGTTTCTGGTTTATCRTCTGCAC
STRE_STAG_CSPA_F	GCCAGCCTCATCTAGCC	STRE_STAG_CSPA_R	TGTAGGAGCTTGTCTATCCAAA
STRE_STAG_GYRB_F	CAACACAATTAGATGTCAAGGT	STRE_STAG_GYRB_R	ACCATCTAATTCACCGTCAGT
STRE_STPN_GYRA_F	ATCGGATGTCTTGATTACCCTT	STRE_STPN_GYRA_R	TAAAGCGAACTGCATAACCAA
STRE_STPN_PLY_F	CCCAGCAATTCAAGTGTTCG	STRE_STPN_PLY_R	CACCTTGCCTGTTACAACTCG
ENTB_KLOX_GAPA_F	TGGCCCGTCCAAAGACA	ENTB_KLOX_GAPA_R	GACGAACGGTCAGGTCAACA
ENTB_SEMA_GYRB_F	TCTATCCGCCTGAAGGACA	ENTB_SEMA_GYRB_R	CAGGTAATCCACCAGCTTCTCG
NEIS_KIKI_RTXA_F	CAGCAGGTAAAGCAACCGTA	NEIS_KIKI_RTXA_R	TCAATATTTGCTGAACTGCCTA
AREN_OWIP_LPOL_F	CATTGAAAGGCACCTCTACCAG	AREN_OWIP_LPOL_R	AGAAAGTAACTCAGAAGCCCTC
AREN_OWIP_SNP_F	TCTTCTTTTCAACAACGTGACC	AREN_OWIP_SNP_R	GATAGCCTTTTACCAGCCACA
AREN_OWLA_LPOL_F	CAAANGCAGTGNCAACAAGGACA	AREN_OWLA_LPOL_R	GGCCCCANTTACTNTGATCCAT
AREN_OWLA_SNP_1_F	ATGACTCTYAARGATGCAATGCTG	AREN_OWLA_SNP_1_R	AACAAYACCTGTGTGCATGTGR
AREN_OWLA_SNP_2_F	TGCATCAAGAACYTCAATAACAGGA	AREN_OWLA_SNP_2_R	TCAACAACRAYACCTGTGTGCAT
AREN_OWLC_LPOL_F	AANTGGGGNCCAATGATGTGC	AREN_OWLC_LPOL_R	AACCNCCCANCCACACTTT
AREN_OWLC_SNP_1_F	TTTGTCTCTCACTATCCCGGTGT	AREN_OWLC_SNP_1_R	ATTGARGGCAGATCCAATGACCC
AREN_OWLC_SNP_3_F	TGTCCCARACYTTGTCCTCA	AREN_OWLC_SNP_3_R	AGGGCAGRTTCAATGAYCCA
AREN_OWMB_LPOL_F	CTTCCTTTGAATTGGCTGGT	AREN_OWMB_LPOL_R	TCTACTCAGACCCAAGCCT
AREN_OWMB_SNP_F	TGCAGGACTGACTTACTCCCAA	AREN_OWMB_SNP_R	GCAGCTTTCTGATATCTTCGAC
AREN_OWMP_LPOL_F	ATNACCCAAGCTGTCTCCAC	AREN_OWMP_LPOL_R	AACACCANGAAAAGAAAAGGGG
AREN_OWMP_SNP_F	ACTCTCANACAATGGAACTNAAAGA	AREN_OWMP_SNP_R	AGACAATCCAGCAATGCACAG
BUNY_ORBA_LPOL_F	CAAGACATGATTACTTTGGTCGT	BUNY_ORBA_LPOL_R	GCAATCATTAACAAAAATTCCTCGT
BUNY_ORBA_SNP_F	AACTTTAAGCGTATCTACACCAC	BUNY_ORBA_SNP_R	TTGTAAATGCCAATTGCTAAGGGA
BUNY_ORBA_SNP_F	ACTTTAAGCGTATCCACACC	BUNY_ORBA_SNP_R	CCCAAGCCAGAGACCACT
BUNY_ORBU_LPOL_F	TGTATCATCACCTGGGCTT	BUNY_ORBU_LPOL_R	TTGCTAAGTCAATCATTACGTG
BUNY_ORBU_SNP_F	TACACTTAACCTTGGGGGCTGGA	BUNY_ORBU_SNP_R	CCCATGTACCTCTGCCGCAT
BUNY_PHRV_LPOL_F	GCATATTCTGGCTTTCATGGTT	BUNY_PHRV_LPOL_R	GTTCTAGGCTTGCTTTCCA
BUNY_PHRV_SNP_F	ATTCATTGGCTGCGTGAANGTTGC	BUNY_PHRV_SNP_R	CTTGCGATCCAGTTTGCTGCTCA
BUNY_PHTO_LPOL_F	CNTCTTGCTTCTGGGCTG	BUNY_PHTO_LPOL_R	GATGGCTCAGTGTCTTCCTC
BUNY_PHTO_MPOLY_F	ACATNGAGCAGATGAAGATGAGA	BUNY_PHTO_MPOLY_R	ATTCCCATAAGCAGGNATCACA
BUNY_PHTO_SNP_F	AAGAANCGTCCACTCATGGC	BUNY_PHTO_SNP_R	TGGCAGNGACACCATCACTC
ENTB_KLOX_GAPA_F	TGGCCCGTCCAAAGACA	ENTB_KLOX_GAPA_R	GACGAACGGTCAGGTCAACA
ENTB_SEMA_GYRB_F	TCTATCCGCCTGAAGGACA	ENTB_SEMA_GYRB_R	CAGGTAATCCACCAGCTTCTCG
FLAV_DV1_3UTR_F	AAATGAAGTCAGGCCGAAAGC	FLAV_DV1_3UTR_R	ACAGCAGGATCTCTGGTCTC
FLAV_DV1_NS3_1_F	ACYTACGTYAGTGCCATAGCTC	FLAV_DV1_NS3_1_R	ATRATCATGTTGTARTTGGGAACTCT
FLAV_DV1_NS3_4_F	GGGCCYCYACCAGAGATTGAAG	FLAV_DV1_NS3_4_R	TGCCCACTCGRGTTGARATGTACC
FLAV_DV1_NS3_5_F	TTYAARCCCGGCACATCTGG	FLAV_DV1_NS3_5_R	GCTGCTTCACCCATACCYAC
FLAV_DV2_3UTR_F	TACACAGACTACATGCCATCCA	FLAV_DV2_3UTR_R	GCAGGATCTCTGGTCTTTCCC
FLAV_DV2_NS5_1_F	AGAAGCAGGACGWACACTYA	FLAV_DV2_NS5_1_R	GTCATTGCCATYTGTGTYACCAT
FLAV_DV2_NS5_2_F	CYTCCGGGAACATAGTGTCA	FLAV_DV2_NS5_2_R	CTTTGAAAACRCGCTGTTGYCCA
FLAV_DV2_NS5_3_F	GGRAACATAGTGTCATCRGTGAAC	FLAV_DV2_NS5_3_R	GGCTGCRTTGCTTCTCACYT
FLAV_DV3_NS3_F	GCAATGAATGGATTACCGACT	FLAV_DV3_NS3_R	GGTTCCTGCCAACTCTCCC
FLAV_DV3_NS5_F	ATNATGAAAGATGGAAGAAAGNTGGT	FLAV_DV3_NS5_R	TTCTGNGCCCANGTTGCTCT
FLAV_DV4_NS2_F	ACTCACNTCAAGAGAGACAGCA	FLAV_DV4_NS2_R	GAAGTAANCCTCCTGCCACCA
FLAV_DV4_NS4B_F	CCACAAGAGAGGCCCAGA	FLAV_DV4_NS4B_R	TGGTCCCAGTTCCCCTCC
NEIS_KIKI_RTXA_F	CAGCAGGTAAAGCAACCGTA	NEIS_KIKI_RTXA_R	TCAATATTTGCTGAACTGCCTA
STRE_STDY_GYRA_F	TTGCTGCTGTGTCATCTCGTTC	STRE_STDY_GYRA_R	GCAACCACATTGAAAGTACCACGAA
STRE_STDY_PLY_F	AGTAYATTATTCARGAACGGGCGCTTC	STRE_STDY_PLY_R	CGCATARCCTGCKGAAATACCAGA
PICO_HEVACOXA10_F	GATGGATCACCGCGTTCCTCA	PICO_HEVACOXA10_R	AGTAGCCACATTCCCAGTCTCG
PICO_HEVACOXA2_F	TTAGAAGTTACGCAACCCCGAT	PICO_HEVACOXA2_R	CGGAGGACTACCAATTAGCTCA
PICO_HEVACOXA4_F	TAGATCAGGTCGATGAGTCAC	PICO_HEVACOXA4_R	GCTCCCATTTTCTTGTGTTCA
PICO_HEVAENT71A_F1	CCACTCACAGGRCCCACG	PICO_HEVAENT71A_R1	GGCWTGTGCTCCRCAGTTAGG
PICO_HEVAENT71A_F2	TGTGCGCCTGTTTTATATCCCT	PICO_HEVAENT71A_R2	CACGGACACCCAAAGTAGTCG
PICO_HEVAENT71B_F	TACCTTTGTGCGCCTGT	PICO_HEVAENT71B_R	ACACCCAAAGTAGTCGGTT
PICO_HEVAENT71C_F	TCAATAGCAGGCATAACGCTCCA	PICO_HEVAENT71C_R	ACGGACACCCAAAGTAGTCG
PICO_HEVAENT71D_F	GTGCGCCTGTTTTATATCCCT	PICO_HEVAENT71D_R	GAGTTGCCCGTTACGACACA
PICO_HEVBCOXB2_F	TACCTTTGTGCGCCTGT	PICO_HEVBCOXB2_R	ACACCCAAAGTAGTCGGTT
PICO_HEVBCOXB4_F	TACCTTTGTGCGCCTGT	PICO_HEVBCOXB4_R	ACACCCAAAGTAGTCGGTT
PICO_HEVBCOXB4_F	TACCTTTGTGCGCCTGT	PICO_HEVBCOXB4_R	ACACCCAAAGTAGTCGGTT
PICO_HEVBCOXB5_F1	ATTCTTATATTGGCTGCTTATGGTG	PICO_HEVBCOXB5_R1	CAAACTCTTGCCGATTAGCTG
PICO_HEVBCOXB5_F2	GGACGCTTCAATTCCGACA	PICO_HEVBCOXB5_R2	TTACCCTATCACTATAGCCACA
PICO_HEVCPOL1_F	CCACCACGAACAAGCACT	PICO_HEVCPOL1_R	AACTTGATTTTCACCGGATGGC
PICO_HEVCPOL2_F	TTCCCCGGTGACATTGCAT	PICO_HEVCPOL2_R	ACACCCAAAGTAGTCGGTT
PICO_HEVCPOL3_F	TGTACGCCTGTTTTATACTCCC	PICO_HEVCPOL3_R	ACGGACACCCAAAGTAGTCG
STAP_STAU_GYRA_F	CAATATAACTCAGGATATGCCACA	STAP_STAU_GYRA_R	GCGTTCTAGAGTCACGACCA
STAP_STAU_LUKSPV_F	CCCCATTAGTACACAGTGGT	STAP_STAU_LUKSPV_R	AATAGTGTCTTTTGGATTTGGCTT
STAP_STAU_MECA_F	ACTACGGTAACATTGATCGCAAC	STAP_STAU_MECA_R	ACCTAATAGATGTGAAGTCGCTTT
ENTB_ESCO_CDT1_F	CCGACAGAAAATAAATGGAACACA	ENTB_ESCO_CDT1_R	AAATCTCCTGCAATCATCCAGT
ENTB_ESCO_CDT2_F	ATTTAACTGATTTTCGCGTTG	ENTB_ESCO_CDT2_R	TTAAAATCACCAAGAATCATCCAGT
ENTB_ESCO_EAEG1_F	CTCGTTAGTGCCCGTGTT	ENTB_ESCO_EAEG1_R	ATCGAATACATCAGCCAGTTCA
ENTB_ESCO_EAEG2_F	ATTACTGAGATTAAGGCTGA	ENTB_ESCO_EAEG2_R	TATGTCGCACTCTGATT
ENTB_ESCO_EAEG3_F	CAGCAGATCATTTTGCCACT	ENTB_ESCO_EAEG3_R	CCTAAACGGGTATTATCACCAGA
ENTB_ESCO_EAEG4_F	GCTAGTGCAGTTATATTTATCGACCA	ENTB_ESCO_EAEG4_R	CCATTACCGCCATTTGCATT
ENTB_ESCO_EAEG5_F	TAATTCTGAGGTTAAAGCTTCCGA	ENTB_ESCO_EAEG5_R	CGCAAATAGAACTGGCCGAA
ENTB_ESCO_EAEG6_F	CGCAGTTGATGTTAAAGCTCCT	ENTB_ESCO_EAEG6_R	ACTAGTTTGTAATGTCCAGGCAGT
ENTB_ESCO_EAEG7_F	AAAGCGACTGTTAGTGC	ENTB_ESCO_EAEG7_R	CCTTCTGTGAGGATGGTAA
ENTB_ESCO_STX2B_F	GCGTTTTGACCATCTTCGTCT	ENTB_ESCO_STX2B_R	ACAGGAGCAGTTTCAGACAGT
ENTB_ESCO_GDH_F	AGCACTTTTGGCGCAAT	ENTB_ESCO_GDH_R	CACTTCTTCTGCCACGGTA
ENTB_ESCO_LTTXB_F	CCTGGATTCATCATGCACCAC	ENTB_ESCO_LTTXB_R	TTATCAATTTTGGTCTCGGTCA
ENTB_ESCO_STTXA1_F	AGCCAGACAATTAACATATATAACACT	ENTB_ESCO_STTXA1_R	GCAGGATTACAACAAAGTTCACA
ENTB_ESCO_STTXA2_F	CGGGTGATTGACACTACACTC	ENTB_ESCO_STTXA2_R	ACAATGTCCGTCTTGCGTT
ENTB_ESCO_STTXA3_F	ATGTTCATAGGCACATCTACGG	ENTB_ESCO_STTXA3_R	GAATCAAAATCAGAACGGTTGC
ENTB_ESCO_STX2A_F	GCATCTCCGCTTTATACAATGACG	ENTB_ESCO_STX2A_R	TGGCTGCAAATTCCATCTGTTCG
PARA_MEASLES_HA_01_F	RATCCCCAACCGACATGCAA	PARA_MEASLES_HA_01_R	CYTYGCCTGCTTCCTTAATTGGGAMA
PARA_MEASLES_HA_02_F	CAGTGATAGATAGGCTTTACCTCT	PARA_MEASLES_HA_02_R	AAGTATCGTAGGTTGCCAAA
PARA_MEASLES_M_F	AGTTGTYAGRCGTACAGCAGGG	PARA_MEASLES_M_R	GTCTTCTTGARCCCGAGTTGTG
PARA_RUBMUMPS_HN_F	TCWAATCGAAGAGTACARAGTGCAT	PARA_RUBMUMPS_HN_R	GRATCAAGATAAACCCCTGACACA
HERP_V1HSV1_TK_F	CTACGTACCCGAGCCGATGACT	HERP_V1HSV1_TK_R	GGCCGTCCCCGAAAGCTGT
HERP_V2HSV2_TK_F	GCATGAGGGCCACGAACGCCAA	HERP_V2HSV2_TK_R	GCGAGCGGGCCTACCGAC
HERP_V3VZV_TK_F	CCTGAAGACGCACAACG	HERP_V3VZV_TK_R	TTTCCAAACTCTCCGCAAAGCTC
HERP_V4EBV_EBNA1_F	TCACGTAGAAAGGACTACCG	HERP_V4EBV_EBNA1_R	GAGGCAAATCTACTCCATCGTC
HERP_V5CMV_VINT_F	GCAAGATCTCCGCGTCACC	HERP_V5CMV_VINT_R	GACTTATCTCCGCAACCTAACAGA
MYCP_MYPN_ADHP1_F	AAAATGGTCCTACACCGACT	MYCP_MYPN_ADHP1_R	TTGACCCAACTGCCACGAA
MYCP_MYPN_CATX_F	GCACAACCCTCATTATCAAGAGC	MYCP_MYPN_CATX_R	CTTTTGTTTGGGGTTTACTTCGAC
PARA_MEASLES_HA_F1	ACACGAACAGATGACAAGTTGC	PARA_MEASLES_HA_R1	GCCTGCTTCCTTAATTGGGACA
PARA_RUBMUMPS_HN_F2	CTGTGCCTGGARTCAGATCCTA	PARA_RUBMUMPS_HN_R2	GGATCAAGATAAACCCCTGAYACAC
PARA_RUBMUMPS_HN_F4	TTTCCGGCCTGTYAATCCAT	PARA_RUBMUMPS_HN_R4	ATTTCKGTTAATGCCTGATTGGTG
PARA_RUBMEMPS_MA_F	ATCAAATATCTGCGGACCATC	PARA_RUBMEMPS_MA_R	AGACCCAGCCTCTTGAGT
PAST_HAIN_SKP_F	CACCCAGATCGCCAAGC	PAST_HAIN_SKP_R	TGCATCAAGCACATAAGTATAACCT
TOGA_RUBELLA_E1_F1	GACCGTCTGGCAACTCTCCGT	TOGA_RUBELLA_E1_R1	GGATCCACTCGGGCATTTCGAC
TOGA_RUBELLA_E1_F2	GCAACGTCACGACCGAAC	TOGA_RUBELLA_E1_R2	GGATCCACTCAGGCATTTCGACRG
TOGA_RUBELLA_NS_F1	GCGCATGGTCCCYAAAGGC	TOGA_RUBELLA_NS_R1	CGGTGGGTGATGACYTGGTT
TOGA_RUBELLA_NS_F2	CGCCACGCTAYTGCACAACACCA	TOGA_RUBELLA_NS_R2	AAACAACGGTGGGTGATGACCTR
ANAP_EHCH_P28_F	TTTGGATTNAAGCAAGATTGGGA	ANAP_EHCH_P28_R	TCAAACATGGATANTAAATCAGTNCC
ANAP_EHEW_P28_F	GCAAAAGAAGAAAAAGCAGAGACT	ANAP_EHEW_P28_R	ACACTAAATCAGCACCAACACC
BUNY_CEV_LPOL_F	GCACCGCATATTACCCCTG	BUNY_CEV_LPOL_R	GGTATNGGCATACTCATCTTAAATTCT
BUNY_CEV_SNP_F	CAAGTCCTAAATTTGGCGAGT	BUNY_CEV_SNP_R	GCGGNTAAAATTTGAATGTTTCCA
BUNY_JCEV_SNP_F	CTTACCATCCATCGGCTT	BUNY_JCEV_SNP_R	GCAATGAGCACTGTCTTCTG
BUNY_LCV_LPOL_F	CCATTAACCATAGATGCACCAC	BUNY_LCV_LPOL_R	ACCATGTGCAACTTTCAATAGGA
BUNY_LCV_SNP_F	CCAAGGCTGCTCTCTCG	BUNY_LCV_SNP_R	GGTCCATCATGCCTTGCTT
BUNY_SHEV_LPOL_F	GGACCTGCATATTAGTTCCGAT	BUNY_SHEV_LPOL_R	CCTCTCGACCATCAATGTCCA
BUNY_SHEV_SSEG_F	CAGCGACGATCTTACCATCCAC	BUNY_SHEV_SSEG_R	GTCACCTTCTGCGACATCCAC
DIPH_SPER_COX1_F	TTGGTATGGTAAGTCATGTGTGT	DIPH_SPER_COX1_R	CATAATGAAAATGAGCCACCAC
EHRL_ANPH_GROEL_F	TTGTACTCAATAAGCTCCGTGGTG	EHRL_ANPH_GROEL_R	ACCTCAACTTCGCTGGAT
FLAV_ELME_PNG_F	ACTGGAAATTGATGTTACCGAT	FLAV_ELME_PNG_R	CTCTGTCAGGAGCCCAA
FLAV_ELME_RPOB_F	TTCATGGACCAAACCAACCC	FLAV_ELME_RPOB_R	GCCTGAGCAATTACTTTAGCTT
FLAV_JEKV_ENVE_F	ATCGACACATGCGCCAA	FLAV_JEKV_ENVE_R	TTAGCGTCTCTCTGTTCCTCCA
FLAV_JEKV_POLYP_F	CCTGATTGGCACAAGAGC	FLAV_JEKV_POLYP_R	GGCAGCACCGTCTACTCA
FLAV_JEMV_ENVE_F	CCGCCATCAACCAAGTGAG	FLAV_JEMV_ENVE_R	CACGGGCTTCATCTCCA
FLAV_JEMV_POLYP_F	GCNCCAGCCATCACAGC	FLAV_JEMV_POLYP_R	CTCCATTTTNACGCGACA
FLAV_JESL_NS5_F	AGGCTCCTNTCAAAACCAT	FLAV_JESL_NS5_R	CTTCCTTTNGCCTTCCCAA
FLAV_JEV_ENVE_F	ATGGGAATTANTCAGCGCANG	FLAV_JEV_ENVE_R	TCCACCACNATGGCNCCTG
FLAV_JEWN_NS5_F	GAAGTTGGCACCCGNCC	FLAV_JEWN_NS5_R	AGTTTCTCCACATCNTCTGGGC
FLAV_MBIV_E_F	TTTCATGTCCTGGAAAGGCTAC	FLAV_MBIV_E_R	TCCAGCTTCAACCTGCACT
FLAV_MBIV_NS5_F	TACAGGCATAAAGTAGTCAAGGTC	FLAV_MBIV_NS5_R	CACTTCCTGCCAGTTGCTC
FLAV_MBIV_NS5_F	TACAGGCATAAAGTAGTCAAGGTC	FLAV_MBIV_NS5_R	CACTTCCTGCCAGTTGCTC
FLAV_MBRV_E_F	GTCATTCACAGCCAATTTAGGAGA	FLAV_MBRV_E_R	GCCACTGTAACCGGAATAGCTC
FLAV_MBRV_NS5_F	CTGTTCAACTCATCAGGTGCAT	FLAV_MBRV_NS5_R	ATTAAGCGTAGATCCCGTCTGT
FLAV_RBAV_NS5_F	CAAGGGATCACGCACCA	FLAV_RBAV_NS5_R	ACAACGCAGTCATCTCCAC
FLAV_RBRB_NS5_F	ACAAGAATCACCATAGCGGAC	FLAV_RBRB_NS5_R	CACTAACTGCCATCCGCTCT
FLAV_RBSV_NS5_F	TACATTGTCCAGGAAGTGGC	FLAV_RBSV_NS5_R	CTCTCCTCCCATTCCCCAA
FLAV_TBL3_ENVE_F	AACCACACACGGGAGACT	FLAV_TBL3_ENVE_R	GCCTTCAGCAGCACTCCA
FLAV_TBL3_NS5_F	AAGTTGACACAAAAGCACAGG	FLAV_TBL3_NS5_R	TCCCCAGCCACATGTACC
FLAV_TBPV_ENVE_F	GTTGTCAAGGTNGAGCCNCA	FLAV_TBPV_ENVE_R	TTCAGCTTTTCNAGTCCCACA
FLAV_TBPV_NS5_F	CCAGGCACCAGNGTGAT	FLAV_TBPV_NS5_R	CCAAGCCACATGTACCAG
META_ANCA_NUCR_F	ACCACCAACACATATACACGTTC	META_ANCA_NUCR_R	CATAATCACCAACAACGCAAA
META_ANVA_COX1_F	ATTCTATTATTACGGCTCATGCTT	META_ANVA_COX1_R	CCAGCTAAAACAGGCAAAGACA
NEIS_KIKI_16SR_F	GAAAGCCTGATCCAGCCATGCC	NEIS_KIKI_16SR_R	ATCTTGCGACCGTACTCCCCAG
PARA_HEHE_VP1_F	TGGACCTTCTTCAAGCCCTG	PARA_HEHE_VP1_R	GCAGTCTTTTCGGTACTCCTCC
PARA_HEHE_VP2_F	TGTCCAACTGAGTGCTCCC	PARA_HEHE_VP2_R	TGGTCTTAGCCAACACTCG
PARA_HENI_GLY_F	CTAATGATGACCCGTCTAGCTG	PARA_HENI_GLY_R	TATCCCATGAAAATGACGCTTG
PARA_HENI_N_F	ACAAAAGAGAGTCAATCCGTTC	PARA_HENI_N_R	ATAGGCTCAAGATAACCACGAT
PICO_ACOA7_5UTR_F	ATTAGAAGCAACACACGTCGAT	PICO_ACOA7_5UTR_R	CTCCGCAGTTAGGATTAGCC
PICO_BCOA23_5UTR_F	TGCGCCTGTTTTATCCACC	PICO_BCOA23_5UTR_R	ACGGACACCCAAAGTAGTCG
PICO_BCOA9_5UTR_F	CGAGAAGCCTAGTAACACCA	PICO_BCOA9_5UTR_R	ACGGACACCCAAAGTAGTCG
PICO_BCOB1_5UTR_F	AGCACTCTGGTATCACGG	PICO_BCOB1_5UTR_R	CTCCGCAGTTAGGATTAGCC
PICO_BCOB3_5UTR_F	TACCTTTGTGCGCCTGT	PICO_BCOB3_5UTR_R	TCAATTGTCACCATAAGCAGCC
PICO_BCOB6_5UTR_F	AAAACAGCCTGTGGGTT	PICO_BCOB6_5UTR_R	ACACCCAAAGTAGTCGGTT
RETR_HIV1MA_POL_F	GCCTGAAAATCCATACAATACTCC	RETR_HIV1MA_POL_R	TTTTGCTCTATGCTGCCCTA
RETR_HIV1MB_POL_F	AAACAATGNGACACCAGGGAT	RETR_HIV1MB_POL_R	CTGCTATTAANTCTTTTGATGGGTC
RETR_HIV1MC_POL_F	TTAGGAATACCACACCCAGCAG	RETR_HIV1MC_POL_R	TTGCCCAGTTTAATTTTCCCAC
RETR_HIV1MD_POL_F	TGCACTTTAAATTTTCCAATTAGTCC	RETR_HIV1MD_POL_R	GGCTCTAAGATTTTTGTCATGCT
RETR_HIV1MF_POL_F	GCCTGAAAANCCATACAATACTCC	RETR_HIV1MF_POL_R	TCTAAGTCAGACCCTACATACAAA
RETR_HIV1MG_POL_F	TGGGCCNGAAAATCCATACAA	RETR_HIV1MG_POL_R	NTCTGGTGTGGTAAATCCCCAT
RETR_HIV1N_POL_F	CTCCCCTACCCAGTGTCCA	RETR_HIV1N_POL_R	CTGCCATNGGAGATTCCCAA
RETR_HIV1O_POL_F	AGANCCTATTTGGAAAGGACCG	RETR_HIV1O_POL_R	TGCTGTTTCAGGNTCAATCTGTGT
RETR_HIV1P_POL_F	ACACAGACAATGGGCCTA	RETR_HIV1P_POL_R	TTGACCAGACTATTCCAGGCTT
RETR_HIV2A_POL_F	TNGAAGCAATGAATCACCACCT	RETR_HIV2A_POL_R	CATCCTCCCTGGNACCCTC
RETR_HIV2B_POL_F	ATGGCAATGTAAAAGAACTAGTCC	RETR_HIV2B_POL_R	GGTCATATCCCCTATTCCTCCC
RETR_HTLV1_POL_F	TTTCACCCATTGCGGACA	RETR_HTLV1_POL_R	AAGCTGCCATCGGGTTT
RETR_HTLV2_POL_F	TACAAATACTGCCTCCACGTCT	RETR_HTLV2_POL_R	TTTTACCACTGGGGTTCATGACA
RETR_HTLV3_POL_F	AGGACCAGGCAATAACCC	RETR_HTLV3_POL_R	AGGAGTGGCCTGAGTCTT
RETR_HTLV4_POL_F	TAATGCCATCACCACTACCCTT	RETR_HTLV4_POL_R	ATGTATGATTTGGCCCAGGA
RETR_XMRV_POL_F	GCCTCCCCATTTCCATTACACC	RETR_XMRV_POL_R	TTCCGTGAAATCAACTTCCCAA
RHAB_LYRB_L1_F	GGCTTCCCGATATCCGTCT	RHAB_LYRB_L1_R	TCTGAAAAGATCCATAGCCAGT
RHAB_LYRB_L2_F	CCCTGTCAACATATACGGCAAA	RHAB_LYRB_L2_R	TGAGAAGATCCACAGCCAGT
RHAB_LYRB_L3_F	GCTGTGCCTCACTTCCAA	RHAB_LYRB_L3_R	GCTGTAATAACCTCTCGCTCA
RHAB_LYRB_L4_F	CACTTTCAAAAGCTTCCCGACA	RHAB_LYRB_L4_R	TGCTGTAATAACCTCTCGCTCA
RHAB_LYRB_L5_F	AAAAGTCTCGCCATATAGGGT	RHAB_LYRB_L5_R	CTCATAGCGTAGCACATGTTG
RICK_RISP_GLTA_F	GCAGATTACGAACTTACCGCTA	RICK_RISP_GLTA_R	TCCTTTAATACTTCTTTGCACGTT
SCHI_SCHA_COX1_F	GTAGTTTGAGCCCATCATATGTTT	SCHI_SCHA_COX1_R	ACCAATTATAAAAGGCCATCACC
SCHI_SCIN_COX1_F	TNGGTTTAAGNCTTCTTATTCGGT	SCHI_SCIN_COX1_R	TCACCNCCACCCATNGGCT
SCHI_SCJA_COX1_F	ACTATAATGTTGCGTCTAAGGTC	SCHI_SCJA_COX1_R	GAACCCATAGCACAAACTAACCC
SCHI_SCMA_COX1_F	GGGGTCATCANATGTTTATGGTT	SCHI_SCMA_COX1_R	CGAGGAAGACCATGNATACCTA
SCHI_SCME_COX1_F	AAGTTTATATTATGGTTCCGGTGT	SCHI_SCME_COX1_R	CTCACTATTCCAAAACCAGGCAA
SPIR_BOBU_CSPZ_F	ATTTTTGTTGAAAAGGCCAAGT	SPIR_BOBU_CSPZ_R	ACCTGCTTCTTGAATTTATTTCCCTA
SPIR_BOGA_P83100_F	CTTTTGATTATGAAAGATCTAGTGCTG	SPIR_BOGA_P83100_R	ATGCTCTTCATCTGTAGCCTT
TAEN_ECCA_NADH_F	TTTTGGTTGTGGTGTATTCGTTT	TAEN_ECCA_NADH_R	CACACACCAAGAATAACCCATA
TAEN_ECGR_NADH_F	TGTTGATTAGTTTGTTAATAATTGCCT	TAEN_ECGR_NADH_R	ACACACATAAAACAAGCCTCA
TAEN_ECMU_COX1_F	TTTCTTTGCATTTAGCAGGTGT	TAEN_ECMU_COX1_R	CCGTCTTCACATCCAACCC
TAEN_TAAS_COX1_F	ATCTGATTTAAACTTGCCTCGT	TAEN_TAAS_COX1_R	TGACCCCACACACTTCTCCC
TAEN_TAMU_COX1_F	CCTGGTTTTGGTATAATTAGTCACA	TAEN_TAMU_COX1_R	ACAATACAATCCCAGTTACACC
TAEN_TASA_COX1_F	TTTTATCCGCCTTTGTCGTC	TAEN_TASA_COX1_R	AGTCTTAACATCTAACCCAACCGTA
TAEN_TASO_COX1_F	ATCGGATTTGAATTTACCACGTT	TAEN_TASO_COX1_R	AACCCCGGAAGAATTAACACA
TOGA_ALEEEV_CAPS_F	AAAAGAAGCGACCACCAC	TOGA_ALEEEV_CAPS_R	CCTTTCCACCGACCCCTC
TOGA_ALEEEV_E1GLY_F	GAATATCTGAAACACCGACAGT	TOGA_ALEEEV_E1GLY_R	GCACTTTTAGCCACGACCAC
TOGA_ALVEEV_PE2_F	CCAGCAGAGACTTTGTCCA	TOGA_ALVEEV_PE2_R	TTTCCACGTAAGCTCCCCTA
TOGA_ALVEEV_POLYP_F	AACTTACACGTCCGTACATGGC	TOGA_ALVEEV_POLYP_R	GGTGCATCTCCACATACGCATC
TOGA_ALWEEV_E1GLY_F	ACATTGTCCAGTTCACTCCCA	TOGA_ALWEEV_E1GLY_R	CCGCGCTCAGTCATCTACG
TOGA_ALWEEV_E2_F	TGTAACCGTCAGTATCACGAG	TOGA_ALWEEV_E2_R	TCTGTGTGCCTAATAAGATCCG
TREM_CRSP_NUCRA_F	CATAGAGGGTGAGAATCCCGTNC	TREM_CRSP_NUCRA_R	CGGGTCGTTTAAAGCNATTATGTCA
TREM_CRSP_NUCRB_F	CCATCTAAAGCTAAATATTGGCGAGA	TREM_CRSP_NUCRB_R	CATGCTGCGTTCCTCAGTCC
TRIC_TRBR_COX1_F	TTTGGNGTAGTGTCTGAAGCAT	TRIC_TRBR_COX1_R	AGTCTAACTCCTGTTANTCCTCC
TRIC_TRNA_COX1_F	ACCTGCTTTTGGAGTAGTATCTGA	TRIC_TRNA_COX1_R	TCTTACTCCTGTTAGTCCTCCT
TRIC_TRNE_COX1_F	ATCCTAGTATTACCCGCCTT	TRIC_TRNE_COX1_R	TCTGACTCCTGTTAATCCTCCT
TRIC_TRPA_COX1_F	TACTACCCGCCTTTGGAGC	TRIC_TRPA_COX1_R	AAGCGTTTGATAGTCTAACTCCTGT
TRIC_TRSP_COX1_F	CCGGAAAATTTAAAGTATTNGGACC	TRIC_TRSP_COX1_R	ACTCCTGTTAGTCCNCCTATTGT
TRIC_TRSS_COX1_F	GGGCATCCAGAAGTTTATATCCTA	TRIC_TRSS_COX1_R	ACTCCTGTAAGTCCACCTATTGT
TRIC_TRZI_COX1_F	ACCTGCTTTTGGNGNAGT	TRIC_TRZI_COX1_R	TCTNACTCCTGTTAGTCCTCC
TROG_PASK_COX1_F	GGTTGTGAGNCANATTTGTATGACTT	TROG_PASK_COX1_R	ACAAAATAATCCCAGTNACNCCCC
TRYP_TRBR_AOX_F	GCCGCTGGTTATTTGACACA	TRYP_TRBR_AOX_R	CAGTACACGCGAGCCACT

## Sheet: Probes
Ippy virus	AAGAGGCATGAGCCAATGAAACACCCAATTTCATGCCAAGAATAGCTTTTTCAAATTCCTTCTCATTGTTAAGGCAGCTACCCTCTAATTGTTTTGTATAAGATTCAAAGTAATCTTCAACAAATCTAGTAAACATTTTCGTTCTCAAATCACCAATGTATAGCTCTCTATTTCCACCAACTTGCTCTTTATATGATAGAGAGAATTTCATCCTGCCAGTGTCC
Ippy virus	CAGTACATCAATGAGCTTGATGTCCTTTCTCCCCTGAGAATCCAGGAGCCTCCTTATGTCTTCAGACCCTTGGCAGGTTAAGACCATATTTGGAGGTAAAAGCTCCAAAACCGCTGATGTTAACCCAGGCTGCACGTTGAAGAGATCTCCAATGTCAATACCATGGGAGTATTTGGAGTCCTGTTTGAACTGTTTGGCGTCTGTGGGTTCTCTGTAGAAGTGTA
Lassa virus	AAGGCTCTGTCACTGACAAACTGTACCACAGCAATGTTAAAGAATTTGTGTTTTTATAGCCAAGAGTCRCCACARTCTTATGACTCAGTGGGACCTGATACAGGAAGGCTTAAGTTTTCTTTGTCATATAAAGAACAAGTWGGTGGTAACAGAGARTTATATATTGGTGATCTTAGGACAAAGATGTTTACTAGACTTATAGAAGATTACTTTGAAGCTCTAAG
Lassa virus	AAGACCTGGATGGACATTGAGGGAAGACCTGAAGATCCAGTGGAAGTTGCCCTCTATCAACCAAGTTCAGGCTGCTAYATTCACTTCTTCCGTGAACCTACTGATTTAAAGCAGTTCAAACAAGATGCTAAGTATTCACATGGGATTGATGTCACAGACCTGTTTGCTGCACAGCCAGGTTTGACCAGTGCTGTTATAGATGCACTCCCCCGAAACATGGTCAT
Lymphocytic choriomeningitis virus	TAACTTGGCAYATGCATAAACTTGTTGAAGTYCCCTTYCCTGTTGTGAATGCAATGATGAAGTCATATGTTAARTCAAAACTGAAGCTTCTCAGAGGTTCAGAAACAACTGTTACTGAGAGAATTTTTAGAGAATATTTTGAAATGGGGATAGTGCCATCCCACATATCYAGCCTTATTGATATGGGACAGGGAATCTTGCATAATGCTTCTGATTTTTATGGT
Lymphocytic choriomeningitis virus	CCTTCTATTCTGTGAGTCTAGTAGCTTTCTGATGTCATCAGAACCTTGACAGCTCAAAACCATCCCCTGTGGAAGAGCACCTATGACTGATGAGGTCAACCCAGGTTGTGCATTGAAGAGATCAGCAAGATCCATACCATGTGAGTACTTAGAATCTTGCTTGAACTGTTTCTGATCAGTAGGTTCCCTATAAAAATGTATGAATTGCCCATTCTGTGGTTGGA
Mobala virus	GCTCTCTGTTCCCTCCAACTTGTTCTTTATAAGACAATGAAAATTTGAGTCTACCAGTATCTGGCCCCTGTGAATTGTAAGACTGAGGGGATTCTTGACTATAAAAACAAAGATTCTTAAGTGCCGCAGTAGTGCAGTTAGTTAGACTTAGTGCTTTGCTCAATGCTTCTGAGTTACTCTCCCTTTCACTTATCCTGGTCTCATTGAACAACCTGTCCCTATCT
Mobala virus	GTGCTGATGATCCAGTAGAAATTGCAATTTATCAACCATCCAATGGACATTACATTCATTTTTACAGAGAGCCAACTGACATTAAGCAGTTCAGACAGGATGCCAAGTATTCACATGGTATTGATGTTCAAGATCTTTTCACAACACAGCCAGGCTTGACCAGTGCAGTGTTGGAGAACCTTCCAAAGAACATGGTCCTGACTTGCCAAGGTGTCGAAGATATC
Mopeia virus	GCAGTGCTAAAGAACTTATGCTTTTACAGCCAAGAGTCACCACAATCTTACACATCGTTGGGACCTGATACTGGGAGGTTAAAGTTCTCATTGTCCTACAAAGAGCAAGTTGGGGGAAATAGAGAGCTTTATATAGGGGACCTCAGGACCAAGATGTTCACCAGACTGATAGAAGATTATTTTGAGGCATTGACTAAGCAATACAAGGGGAGTTGCTTAAATGA
Mopeia virus	CCTTCTATTCTGTGAGTCTAGTAGCTTTCTGATGTCATCAGAACCTTGACAGCTCAAAACCATCCCCTGTGGAAGAGCACCTATGACTGATGAGGTCAACCCAGGTTGTGCATTGAAGAGATCAGCAAGATCCATACCATGTGAGTACTTAGAATCTTGCTTGAACTGTTTCTGATCAGTAGGTTCCCTATAAAAATGTATGAATTGCCCATTCTGTGGTTGGA
Eastern Equine Encephalitis virus	ATTCTCCATCAGGTGTTGCAGTTATTAAAGAGAATGACGTCACCCTTGCTGAGAGCGGATCATTTACATTCCACTTCTCCACTGCAAACATCCATCCTGCTTTTAAGCTGCAGGTCTGCACCAGTGCAGTTACCTGCAAAGGAGATTGTAAGCCACCGAAAGACCACATCGTCGATTATCCAGCACAACATACTGAATCCTTTACGTCGGCGATATCCGCCACC
Eastern Equine Encephalitis virus	AAACGACAGCGAATGTGTATGAAGCTAGAGTCAGATAAAACGTTTCCGATCATGTTGAACGGACAGGTGAATGGTTACGCGTGCGTCGTGGGTGGACGAGTGTTTAAACCGCTGCACGTAGAAGGCAGAATAGACAATGAGCAACTGGCCGCTATCAAGCTGAAGAAGGCCAGCATATATGACCTTGAGTACGGTGATGTGCCACAATGCATGAAATCAGATAC
Venezuelan Equine Encephalitis virus	TAAGGAGCGAAGGGCATGATGGCTATGTACGACTCCAGACCTCATCTCAGTATGGATTAGACCCATCAGGAAACTTGAAAGGCAGAACCATGAGGTATGATATGCATGGAACCATAGAAGAGATACCGTTGCATCAGGTGTCTGTTCATACCTCACGTCCTTGCCACATAATAGATGGGCATGGATACTTTCTGCTTGCCAGGTGCCCTGCAGGAGACTCCATA
Venezuelan Equine Encephalitis virus	AAGTGTGTTCGGTGTGCCGTTGGAAGTTGCCACAGCCCGATCGCTATAGAAGCAGTAAGAAGCGACGGGCATGACGGCTACATCCGAATACAGACATCATCACAGTACGGTTTAGACCCCTCCGGGAATGTTAAGAGCAGAGTTATGAGGTACAATATGTATGGCAAGATCGTAGAAGTTCCATTACATCAGGTTTCTTTACACACATCTCGGCCTTGCCACAT
Western Equine Encephalitis virus	CTCCCACTCCACKACAGCTGTTTTGAAGGAAGCGACCACACATGTGACTGCCGTAGGCAGCATAACACTACATTTTAGCACATCGAGCCCACAAGCAAATTTTATAGTTTCGCTATGCGGCAAGAAGACCACCTGCAATGCTGAATGTAAACCACCGGCCGACCACATAATTGGAGAACCACATAAAGTCGACCAAGAATTCCAGGCGGCAGTTTCCAAAACAT
Western Equine Encephalitis virus	AGAAAAAGATCAGGAGGAAGTTTGTCGGTAGAGAGGAGTACTTGTTCCCACCCGTCCATGGAAAGCTGGTAAAGTGCCACGTTTACGATCACTTGAAGGAGACGTCTGCCGGGTACATAACCATGCACAGGCCAGGCCCACACGCGTATAAGTCCTATCTGGAGGAAGCGTCAGGCGAAGTGTACATTAAACCACCTTCTGGCAAGAACGTCACCTACGAATGT
Rubella Virus	CCTCGGGAGCCCGAATTGCCATGGCCCCGATTGGGCCTCCCCGGTTTGCCAACGCCATTCCCCTGACTGCTCGCGGCTTGTGGGGGCCACGCCAGAGCGTCCCCGGCTGCGCCTGGTCGACGCCGACGACCCCCTGCTGCGCACTGCCCCTGGGCCCGGCGAGGTGTGGGTCACGCCTGTCATAGGCTCTCAGGCGCGCAAGTGCGGACTCCACATACGCGCTG
Rubella Virus	TTTCGACCCAGACGTGCTTGAAGAACAGCAGGTGGCCCTCCTCGACCGCCTCCGGGGGGTCTACGCGGCTCTGCCTGACACCGTTGCCGCCAATGCTGCGTACTACGACTACAGCGCGGAGCGCGTCCTCGCTATCGTGCGCGAACTTACCGCGTACGCGCGGGGGCGCGGCCTCGACCACCCGGCCACCATCGGCGCGCTCGAGGAGATTCAGACCCCCTACG
Dengue virus 1	CATCCAGGATCGGGGAAAACAAGAAGATATCTTCCAGCCATAGTCCGTGAGGCCATAAAAAGGAAGCTGCGCACACTAATTCTGGCTCCCACAAGGGTTGTCGCTTCCGAAATGGCAGAGGCGCTCAAGGGAATGCCAATAAGGTACCAAACAACAGCAGTGAAGAGTGAACACACAGGAAAAGAGATAGTTGACCTCATGTGTCACGCCACTTTCACCATGCG
Dengue virus 1	TGCCTGTGAGCCCCGTCCAAGGACGTAAAATGAAGTCAGGCCGAAAGCCACGGTTTGAGCAAGCCGTGCTGCCTGTAGCTCCATCGTGGGGATGTAAAAACCTGGGAGGCTGCAAACCATGGAAGCTGTACGCATGGGGTAGCAGACTAGTGGTTAGAGGAGACCCCTCCCAAGACACAACGCAGCAGCGGGGCCCAACACCAGGGGAAGCTGTACCCTGGTGG
Dengue virus 2	GATGTTGACCTAGGAAGCGGAACCCGCAACATTGGAATTGAAAGTGAGATACCAAATCTAGACATAATAGGAAAGAGAATAGAGAAAATAAAGCAAGAGCATGAAACATCATGGCACTATGACCAAGACCACCCATACAAAACGTGGGCTTACCATGGCAGCTATGAAACAAAACAAACTGGATCAGCATCATCTATGGTGAACGGAGTGGTCAGACTGCTGAC
Dengue virus 2	GAAGTCAGGTCGGATTAAGCCATAGTACGGAAAAAACTATGCTACCTGTGAGCCCCGTCCAAGGACGTTAAAAGAAGTCAGGCCATCATCAAATGCCATAGCTTGAGTAAACTRTGCAGCCTGTAGCTCCACCTGAGAAGGTGTAAAAAATCTGGGAGGCCACAAACCATGGAAGCTGTACGCATGGCGTAGTGGACTAGCGGTTAGAGGAGACCCCTCCCTTA
Dengue virus 3	ATAGGAAGAGCAAGAATCTCTCAAGGAGCGGGATGGAGCCTTAGAGAAACCGCATGTCTGGGGAAAGCCTACGCTCAAATGTGGAGTCTCATGTATTTTCACAGAAGAGACCTCAGACTAGCATCCAACGCCATATGTTCAGCAGTACCAGTCCACTGGGTCCCCACAAGTAGAACGACATGGTCTATTCATGCTCACCATCAGTGGATGACCACAGAAGACAT
Dengue virus 3	AAATGGAAAAAAGGTCATTCAACTTAGTAGGAAGACTTTTGACACAGAATATCAAAAGACCAGACTGAATGATTGGGACTTCGTGGTGACAACAGACATTTCAGAAATGGGAGCTAACTTTAAAGCAGATAGAGTGATTGACCCAAGAAGATGTCTCAAGCCAGTAATTTTGACAGATGGACCCGAGCGAGTGATCCTGGCTGGACCAATGCCAGTCACCGCAG
Dengue virus 4	CAATTCCACATGACCTTATGGAACTCATTGATGGAATATCACTAGGACTAATTTTGCTAAAAATAGTAACACAGTTTGACAACACCCAAGTGGGAACCTTAGCTCTTTCCTTGACTTTCATAAGATCAACAATGTCATTGGTCATGGCTTGGAGGACCATTATGGCTGTGTTGTTTGTGGTCACACTCATTCCTTTGTGCAGGACAAGCTGTCTTCAAAAACAG
Dengue virus 4	GACAGCTGCTGGGATCATGAAAAATCCCACAGTGGACGGGATAACAGTAATAGATCTAGAACCAATATCCTATGACCCAAAATTTGAAAAGCAATTAGGGCAGGTCATGCTACTAGTCTTGTGTGCTGGACAACTACTCTTGATGAGAACAACATGGGCTTTCTGTGAAGTCTTGACTTTGGCCACAGGACCAATCTTGACCTTGTGGGAGGGCAACCCGGGAA
Japanese encephalitis virus	AAAAGCTGCCACCGGATACTGAGTAGACGGTGCTGCCTGCGTCTCAGTCCCAGGAGGACTGGGTTAACAAATCTGACAACGGAAGGTGGGAAAGCCCTCAGAACCGTCTCGGAAGCAGGTCCCTGCTCACCGGAAGTTGAAAGACCAACGTCAGGCCACAATTTTGTGCCACTCCGCTGGGGAGTGCGGCCTGCGCAGCCCCAGGAGGACTGGGTTAACAAAGC
Japanese encephalitis virus	ACTTGGTGACTACGGAGAAGTCACACTGGACTGTGAGCCAAGGAGTGGACTGAACACTGAAGCGTTTTACGTCATGACCGTGGGGTCAAAGTCATTTCTGGTCCATAGGGAATGGTTTCATGACCTCGCTCTCCCCTGGACGTCCCCTTCGAGCACAGCGTGGAGAAACAGAGAACTCCTCATGGAATTTGAAGAGGCGCACGCCACAAAACAGTCCGTTGTTG
Murray Valley encephalitis virus	GCTGAGGAGGTATGAAGAAACCCATGTGAGTGAGGATAGGGTCTTGTAAATACCATTGATAGAAAATTCTGTAAATATTTAATGTAATATAGTGTAAGTAAAATTTTGAGAGTAAGTAAAATTAAGTAGTAAGACTTGATAGTCAGGCCAGCCGGTTAGGCTGCCACCGAAGGTTGGTAGACGGTGCTGCCTGCGACCAACCCCAGGAGGACTGGGTTACCAAA
Murray Valley encephalitis virus	AACACAGAGGCCTACTATGTCATGACCATTGGAACGAAACATTTTCTAGTACATCGTGAGTGGTTCAATGATTTGCTCTTGCCATGGACATCACCTGCAAGCACAGAATGGAGGAATAGAGAAGTTCTCGTGGAGTTTGAAGAGCCACATGCCACCAAACAATCAGTGGTTGCCTTGGGTTCACAGGAAGGAGCTTTGCACCAAGCTCTGGCTGGAGCCATACC
St. Louis encephalitis virus	AACCTTGCAATCAGGGCATTTGAAATGCAGAGCTAAGCTTGACAAGGTCAAAATCAAGGGAACGACATATGGCATGTGTGACTCTGCCTTCACCTTCAGCAAGAACCCAACTGACACAGGGCATGGGACAGTGATTGTGGAACTGCAGTACACTGGAAGCAACGGACCCTGCCGGGTTCCCATCTCCGTGACTGCAAACCTCATGGACTTGACACCGGTTGGAA
St. Louis encephalitis virus	AAACCAACTGGATCAGCTAGCTCGATGGTGAACGGAGTCGTGAGGCTCCTCTCAAAACCATGGGATATGATCACAAACGTGACCACTATGGCCATGACTGACACCACGCCCTTTGGTCAACAAAGGGTGTTCAAAGAAAAGGTTGACACAAAGGCTCCCGAACCACCACTAGGAGTCGCCCAAATCATGGATGTGACAACAGACTGGCTGTGGGACTTCGTTGC
West Nile virus	TGCTACTCTGCGGAGAGTGCAGTCTGCGATAGTGCCCCAGGAGGACTGGGTTAACAAAGGCAAACCAACGCCCCACGCGGCCCTAGCCCCGGTAATGGTGTTAACCAGGGCGAAAGGACTAGAGGTTAGAGGAGACCCCGCGGTTTAAAGTGCACGGCCCAGCCTGGCTGAAGCTGTAGGTCAGGGGAAGGACTAGAGGTTAGTGGAGACCCCGTGCCACAAAA
West Nile virus	ATGACACAGCTGGCTGGGACACCCGCATCACGAGAGCTGACTTGGAAAATGAAGCTAAGGTGCTTGAGTTGCTTGATGGGGAACATCGGCGTCTTGCCAGGGCCATCATTGAGCTCACCTATCGTCACAAAGTTGTGAAAGTGATGCGCCCGGCTGCTGATGGAAGAACCGTCATGGATGTTATCTCCAGAGAAGATCAGAGGGGGAGTGGACAAGTTGTCACC
Kunjin virus	AACAGGAAGGACTATCCTAAAGGAGAACATTAAGTATGAGGTGGCTATCTTTGTGCATGGGCCAACTACCGTGGAATCGCATGGGAACTACTCCACGCAAACCGGAGCTGCTCAGGCTGGGAGATTTAGCATCACCCCCGCGGCACCCTCTTACACGCTGAAGCTTGGAGAGTATGGAGAGGTAACAGTGGACTGTGAACCACGCTCAGGGATAGACACCAGTG
Kunjin virus	AGATCAATAATTGGAGATGAGAAATATGTGGATTACATGAGCTCATTGAAGAGATATGAAGACACGACATTGGTTGAGGATACAGTATTGTAAATAGTTTGTTAATTGTAAATAAGTATTTTTATTATGTGTAGAAGCTTAGTCTTATAATAGTGTTTTAGTGTGTTTAGAGTTTAGGAAAATTTTAGTGAGGAAGTCAGGCCGGAAAATTTCCGCCACCGGAA
Ilheus virus	AGGGAAGACAGTCATGGACATCATCTCCAGGGAGGACCAGAGAGGGAGTGGCCAAGTAGTCACCTATGCACTTAACACCTTCACCAACCTGGCGGCTCAGCTAGTGAGATGCATGGAGGGGGAGGAACTGCTGACGGAGAGTGACGTGCACGGCTTGAGCCCGAAGAAGAAGCAAGCAGTCCGGAACTGGTTGATCCAAAATGGAAGAGAGAGGCTTTCGCGCA
Ilheus virus	ACACTGCAAATTTGGGGGAATATGGAGAAGCAACAATGGAGTGTGAACCACGGGCCGCCTTGGACATTGACAACTACTATGTCATGTCACTCAACAACAAACATTGGCTTGTCAACCGTGACTGGTTCCATGATCTGGATCTACCCTGGACTGGACCCGCCACTGAGTCGTGGAAGAACCGTGAGAGCCTCATCGAGTTTGAGGAGCCCCATGCTACTCGACAA
Rocio virus	AGTGCAAGCCTGGCTTGACACCAATGGGACTGAAAGGCTCASTCSGATGGCAGTAAGTGGGGATGATTGCGTGGTCAAGCCCATTGACAACAGATTCGCAACTGCTCTCCATTTTCTGAATGGAATGTCAAAGGTGAGGAAAGATATACAGGAATGGAAGCCTTCCACTGGCTGGACCAATTGGCAGGAGGTCCCATTCTGCTCCCATCATTTTAATGAGCTGG
Rocio virus	AACAGTTGATTGCGAACCCCGAGCTGCTCTTGACATTGACAACTATTATGTCATGTCTATGAACAACAAACATTGGCTTGTCAACCGCGACTGGTTTCATGACTTGGACTTGCCTTGGACGGGACCCGCAACAGATGTTTGGAAGAACCGTGAAAGCCTGGTGGAGTTTGAGGAAGCACACGCTACAAGGCAAACCGTTGTCGCGCTAGCCGCTCAGGAGGGAG
Apoi virus	ATTTTATGGAGGGAGAACATAAAAGGCTAGCAGAGGCAATTTTTAAACTTACCTATGAGAATAAAGTTGCATTGTGCCCACGGCCAGGTTCAAAGGGAGGCACTGTGATGGATGTGATATCAAGGAAGGACCAGCGAGGTTCAGGCCAAGTCGTGACTTATGCACTAAACACCCTAACAAATATCAAGGTGCAATTAGTGCGCATGGCTGAATCTGAAGGAATC
Entebbe Bat virus	TTGCTTACAGACACAAGGTGGTGAAAGTTGAGCGTCCAATACCGGGAGGAAGAACAGCCATGGACATCATATACCGGCAAGAACACAGAGGCTCGGGACAGGTGGTCACTTATGCATTCAACACCATTACCAACATGAAAGTGCAACTAATAAGAATGGCCGAGTCAGAGGAAGTCCTCCCCCACCCAGATGAAAAATGGACTGAGGAGCGCGCCGACACACTG
Potiskum virus	TTTCCTGGAATTCGAAGCGCTAGGATTCCTGAATGAGGACCATTGGCTAGGTCGAGAGAACTCAAAAGCTGGAGTGGAAGGAACAGGTCTTCAATATCTGGGTTACATTGTCCAGGAAGTGGCGCGGAATGGAAATGGACTGGTCTATGCTGATGACACCGCAGGCTGGGACACAAAAATAACAGAGGCTGGATCTGGATGATGAACAGTACATTCTCAGCAAA
Rio Bravo virus	AAATATTAAAGTCCAGTTAATCAGATTGGCTGAAAGTGAAGGTGTGCTGGATGAAGATTTCAATGATCACGGGATTGAAACTTGGCTGAACCACTATGGTGAGGAAAGATTGTCTCGTCTCTTGATTAGTGGTGATGACTGCGTGGTAAACGCATGTGATGAAAGGTTTGGGAGAAGCTTGACATGGTTGAACACCATGGAGAAAATCCGCAAGGACATTGACT
Saboya virus	AAAGTTCCGAGGCCCGGACCTGGAGGCAAGGTGTACATGGATGTGATCAGCAGGAGAGACCAGCGTGGATCAGGACAGGTTGTCACCTACCCACTCAACACTGTCACAAACATGAAGGTTCAACTCATCAGAATGGCTGAAGCTGAAAATGTGATCACCAAAAATGACGTGGAAACAGTGTCCCTGATAACCCTGAAGGARCTGCAGCTCTGGTTAGAGGTTCA
Louping Ill virus	GGGGAGGAAGACGGCGACTTTCACGGTTTCTTCAGAGAAGACCATCTTGACCTTAGGGGAATATGGAGACGTCTCACTGCTATGTAGGGTAGCCAGTGGCGTCGACTTGGCTCAGACCATCATCCTGGAGCTCGACAAGACAGCGGAGCACCTTCCAACAGCTTGGCAGGTCCACCGAGACTGGTTTAATGACCTGGCTCTCCCGTGGAAGCATGATGGAAACC
Louping Ill virus	AACCGGGGACAAGAGTGATCAYGAGARCAGTGAATGATTGGATTCTAGAGCGKCTGGCCCARAAAAGCAAACCACGCATGTGYAGCAGAGAGGAATTCATAGCAAAAGTRAGATCAAATGCAGCCCTGGGAGCTTGGTCGGATGARCAGAAYAGATGGGCAAGTGCGAGAGAGGCTGTGGWRGWCCCTGYATTCTGGGCCCTCGTGGATGAGGWGAGAGAGAGG
Powassan virus	ACTATGGAGATGTGTCGCTGACGTGTAAAGTGGCAAGTGGGATTGATGTCGCCCAAACTGTGGTGATGTCACTCGGCAGCAGCAAGGACCACCTGCCTTCTGCATGGCAAGTGCACCGTGACTGGTTTGAGGACTTGGCGCTGCCCTGGAAACACAAGGACAACCAAGATTGGAACAGTGTGGAGAAACTTGTGGAATTTGGACCACCACATGCTGTGAAAATG
Powassan virus	ATGTGTACCAAAGATGAGTTCATAGCGAAGGTGAGGTCCAACGCTGCTCTAGGTGCATGGTCGGATGAACAGAATAAGTGGAGCTCGGCAAAAGAGGCAGTGGAAGATCCAGAATTTTGGAACCTGGTGGATGAAGAGCGCTCCAGACACTTGAAAGGTCAGTGCCGACATTGTGTGTACAACATGATGGGAAAGAGAGAGAAGAAGCTAGGTGAGTTTGGAGT
Tick-borne encephalitis virus	AAACCCACAGTGGGCGGAAGACGGCATCCTTCACGGTCTCCTCAGAAAAGACCATTTTGACCATGGGGGACTATGGAGATGTGTCCTTGTTATGCAGAGTTGCCAGTGGCGTTGACTTGGCTCAGACTGTCATTCTTGAGCTTGACAAGACTCTGGAACACCTTCCGACGGCCTGGCAGGTCCATCGTGACTGGTTCAATGATCTGGCTCTACCGTGGAAACAT
Tick-borne encephalitis virus	ACGGAACGTGACAAGGCTAGAGAGTTGCTCAGAAGAGGGGAGACCAACATGGGGCTGGCTGTCTCACGGGGCACGGCAAAGCTTGCCTGGCTTGAGGAACGCGGATATGCAACTCTCAAGGGAGAGGTGGTGGACCTTGGATGTGGAAGAGGCGGCTGGTCCTATTATGCGGCATCCCGACCGGCAGTCATGAGTGTCAAGGCATACACAATTGGTGGAAAAGG
Bunyamwera virus	TTACACCAAAACACTTTTCAGTGTATACATGGTCAATTTGATAAAGAGAGGATGCGCATCCGCAAATGAGCAATCATCGAAGATCCAGCTGAGAAATATATATCTTTCAGATTATGATATTACACAAAAAGGTGTTAATGATGGTAGGAACTTAGACTCTATTTGGTTCCCTGGTAAAGTTAATTTAAAAGAATATATAAACCAAATATATCTACCATTTTACT
Bunyamwera virus	TTCAGATTCTACCCCTTAGCAATTGGGATCTACAAAGTTCAGCGCAAGGAAATGGAACCAAAATACCTTGAGAAAACAATGCGGCAGAGGTACATGGGACTAGAAGCAGCAACTTGGACTGTTAGTAAATTGACAGAAGTTCAGTCTGCACTGACAGTTGTCTCTAGCTTAGGTTGGAAGAAAACCAATGTTAGTGCAGCTGCCAGGGACTTCCTTGCTAAATT
Batai virus	GGTAAATCTCATGGATTATAATATCCCGAATGTGACTCCAGACAACTACATCTGGGATGGCGATTTCCTGATTATAATGGATTACAAGGTCTCAGTTGGAACTGATAGTAGTGAGATTACTTATAAAAAATACACCACCTTGATCCTACCAATTATGGAGAGTTTGGGCATCCCCACAGAAGTGGCTATAATACGTGCCAACCCACTGACATATCAATTGACAA
Batai virus	ACATTAAAGGACGCGAGATTAAAACTAGTCTCGCAAAAAGAAGTGAATGGGAGGTTACGCTTAACCTTGGGGGCTGGAAGGTTACTGTATTTAATACAAATTTTCCTGGGAACAGGAACAGTCCAGTTCCAGACGATGGTCTTACCCTCCACAGACTCAGTGGATTCCTTGCCAGGTACTTACTTGAGAAGATTCTGAAAGTGAGTGACCCGGAAAAATTGATT
Ilesha virus	TTAAATCAGAGATAACATACCAAAAAAATGATACAGGGGTATATGGCCATAGTAAAATTTATAGAAATTGGATAGTTAAAGAATGGAAAGCATGCAACCCAGTGCCTTCAGCAGGAGGAAGTATTAATGTCATAGAAGTGAATGAAGATATGAGTTTGGCAACAAAAAATTATATCTGCACCAGAGATTGTGTGATAACAGTTGACAAGGAAGATGCTCAAATA
Ilesha virus	AGTCTCGCAAAAAGAAGTGAATGGGAGGTTACACTTAACCTTGGGGGCTGGAAGATTGCTGTATATAATACGAATTTTCCTGGCAACCGGAACAACCCAGTTCCTGACGATGGTCTTACCCTCCACCGCCTCAGTGGATACCTTGCCAGGTACCTACTTGAGAAGATGCTAAAAGTCAGTGAACCGGAAAAACAAATTATCAAATCAAAAATTATTAACCCATT
California encephalitis virus	ATAACATATGATAAATATTAYGARTTGACTAGGGAYATATCCAATAGRTTAAATATTCCRATAGAGATAGTCATTATYCGCATAGATCCAGTGAGTAGGGACCTGCACATAAGCTCTGACAGATTTAARGAAATATATCCTACATTAGTTGTAGATATCAATTTTAATCAATTTTTTGATCTAAAACAAATGCTTTATGAGAAGTTTGGCGATGATGAAGAATT
California encephalitis virus	ATTGTCAATAATCATTTTCCTGGAAACAGGAACAATCCAATTGGTAACAACGATCTTACCATCCACAGATTGTCAGGATATCTAGCCAGATGGGTCCTTGAGCAGTACAAGGAGMATGAAGATGAGTCTCAGCGCGAGTTGATTAAAACAACTGTCATMAACCCRATTGCTGAGTCAAATGGRGTGAGATGGGAYAGTGGGGCAGARATCTACTTGTCCTTCTT
Jamestown Canyon encephalitis virus	TTGTGCAAATCACTGAATATAGAATATAGAAATGACATCCCGTTTGTAGATATATTACTAGATATAAGGCCTGATATAGATCCTTTGACTTTAGATATCCCCCATATAACTCCAGATAACTACTTATATTTAGACAATATTTTATATATCATAGATTATAAAGTCTCTGTATCTAATGAAAGTAGTATTATAACTAACACAAAATATTTTGAGATGACACGAGA
Jamestown Canyon encephalitis virus	CATTTTACTACAGATGATGATGAGTCCCAGAGAGAACTCATAAGGAGCACCATCATTAATCCAATTGCAGAGTCCAATGGCATTCATTGGAACAATGGCCCAGAGATTTATCTTTCATTCTTTCCAGGAACAGAAATGTTTCTGGAAATTTTCAAATTCTATCCCTTGACCATTGGAATTTACAGAGTCAAGCATGGTATGATGGACCCTCAGTATCTGAAGAA
Snowshoe Hare encephalitis virus	GAAACATCCAATATATAAGGAATTTAAGATGAGTATGCCTGTACCTGAGCGCAGACTCTTTGAAGATTCAGTTAGATTCAATGCCTATGAATCAGAAAGGTGGAATACAAATCTAGTAAAAGTGAGGGAATACACAAAAAAAGATTATTCAGATTATATATCAAAATCTGCAAAAAATATTTTCTTAGCTACCGGATTTTATAAGCAACCGAACAAAAATGAAA
Snowshoe Hare encephalitis virus	ATTGTCAGGATATTTAGCCAGATGGGTTCTTGAGCAGTATAAAGAGAATGAAGACGAGTCTCGGCGTGAGTTGATCAAGACAACAATCATCAACCCCATTGCCGAGTCAAATGGAGTGAGATGGGATAGCGGAGCAGAGATCTATCTGTCCTTCTTCCCAGGGACTGAAATGTTTTTGGAGACCTTCAAATTCTACCCGCTGACCATTGGAATTTACAGAGTCA
La Crosse virus	TGTGTTATATATCATAGATTATAAGGTCTCTGTATCGAATGAAAGCAGTGTTATAACATATGACAAATATTATGAGTTAACTAGGGACATATCCGATAGATTAAGTATTCCAATAGAAATAGTTATCGTCCGTATAGACCCTGTAAGTAAGGATTTGCATATTAACTCTGATAGATTTAAAGAACTTTACCCTACAATAGTGGTGGATATAAACTTCAATCAAT
La Crosse virus	TAAGCCAGAGAGGAAGGCTAACCCTAAATTTGGAGAGTGGCAGGTGGAGGTTATCAATAATCATTTTCCTGGAAACAGGAACAACCCAATTGGTAACAACGATCTTACCATCCACAGATTATCTGGGTATTTAGCCAGATGGGTCCTTGATCAGTATAACGAGAATGATGATGAGTCTCAGCACGAGTTGATCAGAACAACTATTATCAACCCAATTGCTGAGT
Rift Valley fever virus	TTCTTGGAGGATTCTAAGTACAGCTTGCTACAAAAGATGGCTGCATATTCTGGCTTTCATGGTTTCAATGATATGGAGCCGGAAGATATATTATTCCTATTTCCGAACATTGAGGAATTAGAATCACTGGATTCTATAGTTTACAACAAGGGAGAAATAGACATCATCCCAAGAGTCAACATCAGGGATGCAACCCAAACCAGGGTCACCATCTTTAATGAGCA
Rift Valley fever virus	AACTCGTGATAGAGTCAACTCATCCCGGGAAGGATTCCCCTCCTTTAGCTTATACTTGTTGATGAGAGCCTCCACAGTTGCTTTGCCTTCTTTCGACATTTTCATCATCATCCTCCGGGGCTTGTTGCCACGAGTTAGAGCCAGAACAATCATTTTCTTGGCATCCTTCTCCCAGTCAGCCCCACCATACTGCTTTAAGAGTTCGATAACCCTACGGGCATCAA
Toscana virus	GATTTCAGCCACTCCATTCCAGCTTCATAAAGTTGGTGGGAACATCCGCTGGAAGGGGCTTTTCAATCCTTACTCCGGAAATAGCATTGATGAGCTACAAACTTTAATCAGCTGCTGCTACAATGGTTATTTCAAGAACAAAGAGGAAGACACTGAGCCATCAGCATTATCAGCCATGTACAAGAAGATTATAGAGCTAGAACATCTCCGACCCCCAACAGACA
Toscana virus	CTGAACGGTCCATGGAACAAAAGCAGCCGACACTCTAGACAGAGTGATGGTGTCTCTGCCAGGATTTCCCTCCTTCAGCTGGTACACTGATATCAGATTGGCCACTATAGACGCACCCTTCTCTGACATCTTCTTCATCATGGCCTCAGGCTTATTCCCTCTGACAAGGTTCAGCACAATCATCATCTTCACGTCCTTCTTCCAGTCCCTGCCCTTTGCTGTTC
HEV-A Coxsackievirus Type A2	CCCTGAATGCGGCTAATCCTAACTGCGGAGCACATGCCCTCAAACCAGGGGGTGGTGTGTCGTAACGGGTAACTCTGCAGCGGAACCGACTACTTTGGGTGTCCGTGTTTCTTTTTATTCTTATAATGGCTGCTTATGGTGACAATTAAAGAATTGTTACCATATAGCTATTGGATTGGCCATCCGGTGACTAACAAATCGCTCATATACCAGTTTGTTGGTTT
HEV-A Coxsackievirus Type A4	AAACCCCACGGGCGACCGTGGCAGTGGCTGCGTTGGCGGCCTGCCCATGGGACAACCCATGGGACGCTCTAATACAGACATGGTGTGAAGAGTCTATTGAGCTAGTTAGTAGTCCTCCGGCCCCTGAATGCGGCTAATCCTAACTGCGGAGCACACACCCTCAATCCAGGGGGCAGTGTGTCGTAACGGGCAACTCTGCAGCGGAACCGACTACTTTGGGTGTC
HEV-A Coxsackievirus Type A7	TTTCCCCGGACCGAGTATCAATAGACTGCTCACGCGGTTGAGGGAGAAARCGTCCGTTAYCCGGCYAACTACTTCGAGAAACCYAGTAGCACCATGAAARTWGCRGAGTGTTTCGCTCAGCACTTCCCCAGTGTAGATCAGGTCGATGAGTCACCGCATTCCCCACGGGCGACCGTGGCGGTGGCTGCGTTGGCGGCCTGCCTAYGGGGCAACCCRTAGGACGC
HEV-A Coxsackievirus Type A10	CGCGTTGGCGGCCTGCCCATGGGGCAACCCATGGGACGCTCTAATATGGACATGGTGTGAAGAGTCTATTGAGCTAGTTAGTAGTCCTCCGGCCCCTGAATGCGGCTAATCCTAACTGCGGAGCACGTGTCCCCAACCCAGGGGATAGCGTGTCGTAACGGGTAACTCTGCAGCGGAACCGACTACTTTGGGTGTCCGTGTTTCCTTTATTCTTATCCTGGCTG
HEV-A Enterovirus Type 71-a	CTTCGAGAAACCTAGTAGCACCATTGAAGCTGCAGAGTGTTTCGCTCGGCACTTCCCCCGTGTAGATCAGGTCGATGAGTCACTGCAATCCCCACGGGCGACCGTGGCAGTGGCTGCGCTGGCGGCCTGCCTATGGGGCAACCCATAGGACGCTCTAATGTGGACATGGTGCGAAGAGTCTATTGAGCTAGTTAGTAGTCCTCCGGCCCCTGAATGCGGCTAAT
HEV-A Enterovirus Type 71-b	GCTGAAGGAGAAAACGTTCGTTACCCGACCAACTACTTCGAGAAGCTTAGTACCACCATGAACGAGGCAGGGTGTTTCGCTCAGCACAACCCCAGTGTAGATCAGGCTGATGAGTCACTGCAACCCCCATGGGCGACCATGGCAGTGGCTGCGTTGGCGGCCTGCCCATGGAGAAATCCATGGGACGCTCTAATTCTGACATGGTGTGAAGAGCCTATTGAGCT
HEV-A Enterovirus Type 71-c	AAGTTGCGGAGAGCTTCGTTCAGCACTCCCCCAGTGTAGATCAGGTCGATGAGTCACCGCATTCCCCACGGGCGACCGTGGCGGTGGCTGCGTTGGCGGCCTGCCCATGGGGTAACCCATGGGGCGCTCTAATACGGACATGGTGTGAAGAGTCTACTGAGCTAGTTAGTAGTCCTCCGGCCCCTGAATGCGGCTAATCCCAACTGCGGAGCACACGCCCACAA
HEV-A Enterovirus Type 71-d	AAGCTGCAGGGTGTTTCGCTCAGCACTTCCCCCGTGTAGATCAGGTCGATGAGTCACTGCAACCCCCACAGGCGACTGTGGCAGTGGCTGCGTTGGCGGCCTGCCTATGGGGAGACCCATAGGACGCTCTAATGTGGACATGGTGTGAAGAGCCTATTGAGCTAGTTAGTAGTCCTCCGGCCCCTGAATGCGGCTAATCCTAACTGCGGAGCACACGCCCTCAA
HEV-B Coxsackievirus Type A9	AGTATCAATAGGCTGCTCGCGCGGCTGAAGGAGAAAGCGTTCGTTACCCGGCCAGCTACTTCGAGAAGCCTAGTAACACCATGAAGGTTGCAGAGTGTTTCGCTCAGCACTTCCCCTGTGTAGATCAGGCCGATGAGTCACCGCGTTCCTCACGGGCGACCGTGGCGGTCGCTGCGCTGGTGGCCTGCCTATGGGGCAACCCATAGGACGCTCTAATGCTGACA
HEV-B Coxsackievirus Type A23 (Echo 9)	GCTGCTTGCGCGGCTGAAGGAGAAAACGTTCGTTACCCGGCCAATTACTTCGAGAAACCTAGTACCACCATGAACGTTGCGCAGCGTTTCGCTCCACACAACCCCGGTGTAGATCAGGTCGATGAGTCACCGCAATCCCCACGGGCGACCGTGGCGGTGGCTGCGCTGGCGGCCTGCCCATGGGGCAACCCATGGGACGCTTCAATACTGACATGGTGTGAAGA
HEV-B Coxsackievirus Type B1	CTGTTACCCCGGACTGAGTATCAATAAGCTGCTCACGCGGCTGAAGGAGAAAACGTTCGTTAYCCGGCCAATTACTTCGAGAAACCTAGTACCACCATGGARGTTGCGCAGTGTTTCGCTCCGCACAACCCCAGTGTAGATCAGGCCGATGAGTCACCGCGTTCCCCACGGGCGACCGTGGCGGTGGCTGCGTTGGCGGCCTGCCCATGGGGCAACCCATGGGA
HEV-B Coxsackievirus Type B2	AATAGGTAGCCCAGCACACCAGCTGGGTCCTGACCAAGCACTTCTGTWACCCCGGACCGAGTATCAATARGCTGCTCACGCGGCTGAAGGAGAAAACGTTCGTTACCCGGCCAACTACTTCGAGAAACCTAGTASCACCATGAARGTTGCGCAGTGTTTCGCTCCGCACAACCCCAGTGTAGATCAGGYCGATGAGTCACCGCATTCCCCACGGGTGACCGTGG
HEV-B Coxsackievirus Type B3	AACTACTTCGAAAAACCTAGTAACACCATGGAAGTTGCAGAGTGTTTCGCTCAGCACTACCCCAGTGTAGATCAGGTCGATGAGTCACCGCATTCCCCACGGGCGACCGTGGCGGTGGCTGCGTTGGCGGCCTGCCCATGGGGAAACCCATGGGACGCTCTAATACAGACATGGTGCGAAGAGTCTATTGAGCTAGTTGGTAGTCCTCCGGCCCCTGAATGCGG
HEV-B Coxsackievirus Type B4	TGGCTGCTTATGGTGACAATTGAGAGATTGTTACCATATAGCTATTGGATTGGCCATCCGGTGTCRAATAGAGCAATTATTTACCTGTTTGTTGGTTTCATACCCTTAAACTTCAAAGTTCTTAAAACTCTTAATTTTATAYTAAAACTCAACTCAGATAAAATGGGAGCTCAGGTTTCAACACAAAAGACAGGGGCACACGAGACTAGTCTGAGCGCCAGTGG
HEV-B Coxsackievirus Type B5	CAGGTCGATGAGTCACCGCATTCCCCACGGGCGACCGTGGCGGTGGCTGCGTTGGCGGCCTGCCTACGGGGCAACCCGTAGGACGCTTCAATACAGACATGGTGCGAAGAGTCTATTGAGCTAGTTAGTAGTCCTCCGGCCCCTGAATGCGGCTAATCCTAACTGCGGAGCACATACCCTCAACCCAGGGGGCAGTGTGTCGTAACGGGTAACTCTGCAGCGGA
HEV-B Coxsackievirus Type B6	AACCCAGTAACACCATGAAAGTTGCGTAGTGTTTCGTTCAGCACAATCCCAGTGTAGATCAGGTCGATGAGTCACCGCATTCCCCACAGGCGACTGTGGCGGTGGCTGCGTTGGCGGCCTGCCCATGGGGCAACCCATGGGACGCTTCAATACTGACATGGTGCGAAGAGTCTATTGAGCTAATTGGTAGTCCTCCGGCCCCTGAATGCGGCTAATCCTAACTG
HEV-C Poliovirus Type 1	GATGTTGTATAGACTGCTTGCGTGGTTGAAAGCGACGGATCCGTTATCCGCTTATGTACTTCGAGAAGCCCAGTACCACCTCGGAATCTTCGATGCGTTGCGCTCAGCACTCAACCCCAGAGTGTAGCTTAGGCTGATGAGTCTGGACATCCCTCACCGGTGACGGTGGTCCAGGCTGCGTTGGCGGCCTACCTATGGCTAACGCCATGGGACGCTAGTTGTGA
HEV-C Poliovirus Type 2	AAAAGCCTAGTATCGCCTTGGAATCTTCGACGCGTTGCGCTCAGCACCCGACCCCGGGGTGTAGCTTAGGCTGATGAGTCTGGACATTCCTCACCGGTGACGGTGGTCCAGGCTGCGTTGGCGGCCTACCTATGGCTAACGCCATAGGACGCTAGATGTGAACAAGGTGTGAAGAGCCTATTGAGCTACATAAGAGTCCTCCGGCCCCTGAATGCGGCTAATCC
HEV-C Poliovirus Type 3	CACGAACAAGCACTTCTGTTTCCCCGGTGAAGTTGCATAGATTGTTCCCACGGTTGAAAGYGACCGATCCGTTATCCGCTCATGTACTTCGAGAAGCCTAGTATCGCTCTGGAATCTTCGACGCGTTGCGCTCAGCACTCAACCCCGGAGTGTAGCTTGGGCCGATGAGTCTGGACAGTCCCCACTGGCGACAGTGGTCCAGGCTGCGCTGGCGGCCCACCTGT
HHV1 - HSV1	TGGTAATGACAAGCGCCCAGATAACAATGGGCATGCCTTATGCCGTGACCGACGCCGTTCTGGCTCCTCATATCGGGGGGGAGGCTGGGAGCTCACATGCCCCGCCCCCGGCCCTCACCCTCATCTTCGACCGCCATCCCATCGCCGCCCTCCTGTGCTACCCGGCCGCGCGATACCTTATGGGCAGCATGACCCCCCAGGCCGTGCTGGCGTTCGTGGCCCTC
HHV2 - HSV2	CGCACCGTGTTGGCGAGTAGATCGTAGACACGGCGAATGGCGGACAGCATGGCCAGGTCAAGCCGCTCGCCCGGGCGTTGGCGTCTGGCCAGGCGGTCGGCGTGTTCGGCCTCCGGAAGGACACCCAGGACCAGGTTCGTGCCGGGCGCGGTCGGGGGCATGAGGGCCACGAACGCCAACACGGCCTGGGGGGTCATGCTTCCCATGAGGTACCGCGCGGCCGG
HHV3 - VZV	GTTATCCGACCGACACCCAATCGCCTCAACTATATGTTTTCCCTTGTCCAGATACTTAGTGGGAGATATGTCCCCAGCGGCGCTTCCTGGGTTATTGTTTACGCTTCCCGCTGAACCCCCCGGGACCAACTTGGTAGTTTGTACCGTTTCACTCCCCAGTCATTTATCCAGAGTAAGCAAACGGGCCAGACCGGGAGAAACGGTTAATCTGCCGTTTGTTATGG
HHV4 - EBV	AGGCGCAAAAAAGGAGGGTGGTTTGGAAAGCATCGTGGTCAAGGAGGTTCCAACCAGAAATTTGAGAACATTGCAGAAGGTTTAAGAACTCTCCTGGCTAGGTGTCACGTAGAAAGGACTACCGATGAAGGAACTTGGGTCGCCGGTGTGTTCGTATATGGAGGTAGTAAGACCTCCCTTTACAACCTCAGGCGAGGAATTGCCCTTGCTATTCCACAATGTCG
HHV5 - CMV	TAGTTTTCCTCTTGTAGCAACGTGAGGACGACTACTCCGTGTGGCTCGACGGTACGGTGGTCAAAGGCTGTTGGGGATGCAGCGTCATGGACTGGTTGTTGAGGCGGTATCTGGAGATCGTGTTCCCCGCAGGCGACCACGTCTATCCCGGACTCAAGACGGAATTGCATAGTATGCGCTCGACGCTAGAATCCATCTACAAAGACATGCGGCAATGCGTAAGT
Rabies virus 6162	AAAACATGTTATGGTGCCATTAAACCGCTGCATTTCATCAAAGTCAAGTTGATTACCTTTACATTTTGATCCTCTTGGATGTGAAAAAAACTATTAACATCCCTCAAAAGACTCAAGGAAAGATGGTTCCTCAGGCTCTCCTGTTTGTACCCCTTCTGGTTTTTCCATTGTGTTTTGGGAAATTCCCTATTTACACGATACCAGACAAGCTTGGTCCCTGGAGT
Rabies virus 6176	AGCATCTGTATTCGGCAATCAGAGTGGGCACAGTTGTCACCGCTTATGAAGACTGCTCAGGACTGGTATCGTTTACAGGGTTCATAAAGCAGATCAATCTCACCGCAAGAGAAGCAATACTATATTTCTTCCACAAGAACTTTGAAGAAGAGATAAGGAGAATGTTTGAGCCAGGGCAAGAGACAGCTGTTCCTCACTCTTATTTCATCCACTTCCGTTCACTA
Rabies virus 6177	AATCATCAAGCCCGTCCAAACTCATTTGCCGAGTTTCTAAACAAGACATACTCTAGTGACTCATAAAGAATTGAACAACAAGATTGAAAAGAACCTACAAATTGTGTATATCCCACATGAAAAAAACTAACACCCCTCCTTTTGAACCATCCCAACCATGAGCAAGATCTTCGTCAATCCGAGTGCAATCAGAGCCGGCTTGGCTGACCTCGAGATGGCTGAGG
Rabies virus 6178	TAGGGCTGATTATCAAGAAGGAAGAAACTATGTGTAGCTATGACTTTCTCATCTAYGGGAAAACTCCTTTATTTCGAGGCAATATCTTGGTACCGGAGTCAAAGAGATGGGCCAGAGTCTCTTGTATCTCGAACGACCAGATAGTCAACCTCGCCAATATAATGTCAACCGTGTCCACCAATGCATTGACTGTAGCACAACACTCTCAATCCCTGATCAAGCCG
Rabies virus 6179	TGAACAAAGTGTTTAAAAAGTTAATCGACAGGGTCACTGGGCAAGGGCTTTTAGACTATTCAAGGGTCACATATGCATTTCACCTGGACTACGAGAAGTGGAACAATCATCAAAGATTAGAGTCGACAGAGGATGTATTCTCTGTTCTGGATCAGGTGTTTGGATTGAAGAGAGTGTTTTCTAGAACACATGAGTTTTTTCAGAAGTCCTGGATCTATTATTCA
Hendra Virus	TTAGGGAAATTGATTTAATTGGGTTGGAGGACAAATTTGCATCAGCGGGATTAAATCCAGCTGCAGTTCCCTTTGTCCCCAAGAATCAATCAACCCCAACTGAGGAGCCTCCAGTCATCCCGGAGTATTACTATGGATCTGGGAGGAGAGGAGATCTCTCAAAATCTCCTCCTAGAGGTAATGTCAATCTGGACAGCATCAAGATTTACACTTCGGACGACGAG
Hendra Virus	ATATTATGCCATCAGATGATTTTGCTAACACTTTTCTTACCCCATGACACTGATAGGTTAAATTATCATGCAGACCATCTCAATGATTACGATTTAGAGACCTTGTGTGAGGAGTCAGTATTGATGGGCATCGTTAACGCAATCAAACTCATCAACATTGATATGAGGTTGAATCACATTGAGGAACAGATGAAAGAGATACCCAAGATCATCAACAAAATAGA
Nipah Virus	TCTCCCAGAGTCTATCAGTAAGGAAGTTCATGGTTGAGATCCTCATAGAAGTCAAGAAAGGAGGATCTGCTAAAGGCAGAGCAGTAGAAATAATCTCAGACATCGGAAACTATGTCGAGGAAACTGGTATGGCAGGATTCTTCGCAACCATCAGATTCGGGTTGGAGACAAGGTATCCAGCACTTGCACTCAACGAATTCCAGAGTGACCTCAACACCATCAAA
Nipah Virus	TCAGGACAGAGTTTAAATACAATGATTCAAATTGTCCCATCACGAAGTGTCAATACAGTAAACCTGAAAATTGCAGGCTATCTATGGGGATTAGACCAAACAGCCATTATATCCTTCGATCTGGACTATTAAAATACAATCTATCAGATGGGGAGAACCCCAAAGTTGTATTCATTGAAATATCTGATCAAAGATTATCTATTGGATCTCCTAGCAAAATCTAT
Measles Virus	TTCCAGCAGGCGTGTAAGGGTAAAATCCAAGCACTCTGCGAGAATCCCGAGTGGGCACCATTGAAGGATAACAGGATTCCTTCATACGGGGTCTTGTCTGTTGATCTGAGTCTGACAGTTGAGCTTAAAATCAAAATTGCTTCGGGATTCGGGCCATTGATCACACACGGTTCAGGGATGGACCTATACAAATCCAACCACAACAATGTGTATTGGCTGACTAT
Measles Virus	GTGGCCTTCAACCTGCTGGTGACCCTTAGGATTGACAAGGCGATTGGCCCTGGGAAGATCATCGACAATGCAGAGCAACTTCCTGAGGCAACATTTATGGTCCACATCGGGAACTTCAGGAGAAAGAAGAGTGAAGTCTACTCTGCCGATTATTGCAAAATGAAAATCGAAAAGATGGGCCTGGTTTTTGCACTTGGTGGGATAGGGGGCACCAGTCTTCACAT
Mumps Virus	ATGTCCTGGATACCTATATATTCATTCACTCGTCCTGGTTCAGGCAACTGCAGTGGTGAAAATGTGTGCCCAACTGCTTGTGTGTCAGGGGTTTATCTTGATCCCTGGCCATTAACTCCATATAGCCACCAATCAGGCATTAACAGAAATTTCTATTTCACAGGTGCACTATTAAATTCAAGCACAACCAGAGTAAATCCTACCCTTTATGTCTCTGCCCTTAA
Mumps Virus	TCACTCAAGTTTCGAGTTGCGCGCCCATTGCTTGCTGCACGATCTAGATTAGTAAGAGCAGTTCAGATGGAAGTTTTGCTTCGGGTAACTTGCAAAAAAGATTCCCAAATGGCAAAGAGCATGTTAAATGACCCTGATGGAGAAGGGTGCATTGCATCCGTGTGGTTCCACCTGTGTAATCTGTGCAAAGGCAGGAATAAACTTAGAAGTTACGATGAAAATTA
HIV-1-M-A	TGGGGGATGCATATTTTTCAGTTCCTTTAGATRAAARCTTTAGAAAGTATACTGCATTCACCATACCTAGTATAAACAATGAGACACCAGGAATCAGATATCAGTACAATGTGCTACCACAGGGATGGAAAGGATCACCAGCAATATTCCAGTATAGCATGACAAAAATCTTAGAGCCCTTTAGATCAAAAAATCCAGAAATAATTATCTATCAATACATGGAT
HIV-1-M-B	ATCTGTTGAGGTGGGGATTTACCACACCAGACAAAAAACATCAGAAAGAACCTCCATTCCTTTGGATGGGTTATGAACTCCATCCTGATAAATGGACAGTACAGCCTATAGTGCTGCCAGAAAAGGACAGCTGGACTGTCAATGACATACAGAAGTTAGTGGGAAAATTAAATTGGGCAAGTCAGATTTATGCAGGGATTAAARTAAAGCAATTATGTAAACTC
HIV-1-M-C	ATCAATATATGGATGACTTATATGTAGGATCTGATTTAGAAATAATGCAACATAGAGCAAAAGTAGAGGAGTTAAGAGAACACTTATTGAAATGGGGATTTACCACACCAGACAAGAAACATCAGAAAGAACCTCCATTTCTTTGGATGGGGTATGAACTCCATCCTGACAAATGGACAGTACAGCCTATACAGCTGCCAGAAAAGGAGAGCTGGACTGTCAAT
HIV-1-M-D	AATATTTGCCATAAAGAAAAAAGACAGTACTAAGTGGAGAAAATTAGTAGATTTCAGAGAACTTAATAAGAGAACTCAAGACTTTTGGGAAGTTCAATTAGGAATACCACATCCTGCAGGGCTAAAAAAGAAAAAATCAGTAACAGTACTGGATGTGGGTGATGCATATTTTTCAGTTCCCTTAGATGAAGACTTTAGAAAGTATACTGCATTTACCATACCTA
HIV-1-M-F	TGGGGGATGCATATTTTTCAGTTCCCTTAGATAAGGABTTCAGGAAGTACACTGCATTCACCATACCTAGTATCAACAATGAGACACCAGGAATTAGATACCAGTACAATGTGCTTCCACAAGGATGGAAAGGATCACCAGCAATATTCCAATGTAGCATGACVAAAATCTTAGAGCCCTTTAGAGCAAAAAATCCAGAVATAGTHATCTACCAATACATGGAT
HIV-1-M-G	AAGAACTCAAGACTTCTGGGAGGTCCAATTAGGAATACCTCATCCCGCGGGGTTAAAAAAGAAAAAATCAGTAACAGTACTAGATGTGGGAGATGCATATTTTTCAGTTCCCTTAGATGAAGACTTTAGAAAGTATACTGCATTCACTATACCTAGTATAAATAATGAGACACCAGGGATTAGATATCAGTACAATGTGCTTCCACAGGGATGGAAAGGATCAC
HIV-1-N	TAACAGAAGATAGATGGAACARGCACCTGAAGATCAGGGACCAGCTAGAGAGCCATTCAATGAATGGGCACTAGAGCTCCTAGAAGAGCTAAAAGCAGAAGCAGTAAGACATTTCCCTAGGCCTTGGCTACAAGCCTTGGGACAATACATTTATGAGACTTATGGRGACACTTGGGWAGGAGTTATGGCAATTATAAGAATCTTACAACAACTGCTATTTACCC
HIV-1-O	ATAATCAGAGATTATGGAAAACAGATGGCAGGTACTGATAGTATGGCAAGTGGACAGACAGAAAGTGAAAGCGTGGAACAGCCTGGTGAAATACCATAAGTACAGGTCTAGGAAGGCCAAGGACTGGTATTACAGACATCATTATGAATCYAGAAATCCAAGAGTCAGTTCAGGTGTATATATTCCAGTAGGGATRGCTTGTATAGTAGTGACCACATATTGGG
HIV-1-P	AACACTTAAAGACAGCAGTTCAAATGGCAGTATTTGTTCACAATTTTAAAAGAAAAGGGGGGATTGGGGGGTACACTGCTGGAGACAGGATCATAGATATTATGGCTACACAAATACAAACAACAGAATTACAAAAACAAATTTTAAAAATTCAAAATTTTCGGGTCTATTACAGAGACAGCAGAGACCCTATTTGGAAAGGACCAGCGACGCTTCTGTGGAAA
HIV-2 subtype A (BEN, ROD)	GGCAGTTCATTGCATGAATTTTAAAAGAAGGGGAGGAATAGGGGATATGACCCCAGCAGAAAGACTAATCAATATGATCACCACAGAACAAGAAATACAATTCCTCCAAGCAAAAAATTCAAAATTAAAAAATTTTCGGGTCTATTTCAGAGAAGGCAGAGATCAGCTGTGGAAAGGACCTGGGGAACTACTGTGGAAGGGAGACGGAGCAGTCATAGTCAAGG
HIV-2 subtype B (EHO, UC1)	AAGACAGACAGCTCTCTTCCTGTTAAAACTGGCCAGCAGATGGCCTATCACACACCTGCACACAGACAACGGTGCCAACTTCACCTCACAAGATGTGAAGATGGTAGCCTGGTGGGTAGGAATAGAGCAAACCTTTGGAGTACCCTATAACCCACAAAGTCAAGGAGTAGTGGAAGCAATGAACCATCATCTAAAAAATCAAATAGACAGACTCAGAGATCAAG
HTLV-1	TAACCACATCTGGCAAGGCGACATTACCCATTTCAAATATAAAAATACGCTGTATCGCCTTCATGTATGGGTAGACACCTTTTCAGGAGCCATCTCAGCTACCCAAAAGAGAAAAGAAACAAGCTCAGAAGCTATTTCCTCTTTGCTTCAGGCCATTGCCTATCTAGGCAAGCCTAGCTACATAAACACAGACAACGGCCCTGCCTATATTTCCCAAGACTTCC
HTLV-2	TGAGACTATCAGCGCCGTTCTTCAGGCCATCTCCCTCCTAGGGAAACCACTCCACATTAATACAGATAATGGGCCAGCCTTCTTGTCACAAGAATTCCAGGAGTTTTGTACCTCCTATCACATCAAACATTCTACCCACATACCATACAACCCCACCAGCTCAGGCCTGGTCGAAAGGACCAATGGTATAATCAAAAATTTACTAAACAAATATCTACTAGACT
HTLV-3	ATTGACCTYACTGACGCCTTYTTCCAAATCCCSCTRCCARCCRTTTTYCARCCRTACTTTGCATTYACTCTCCCCCARCCRAACAACYATGGTCCMGGAACCAGATACTCTTGGAGAGTRYTACCCCAGGGGTTCAARAAYAGYCCAACTTTRTTTGAACARCAACTSTCCCATATACTYRCCCCYGTGCGRAAARCCTTTCCTAAYTCCCTYATTATACAATA
HTLV-4	CATCGATCTCACGGACGCTTTCTTCCAGATTCCCCTCCCAAAGCGATTCCAGCCCTACTTCGCCTTTACCATCCCCCAGCCATTAAATCATGGGCCTGGGAGCAGGTACGCTTGGACAGTCCTTCCCCAAGGCTTCAAAAACAGCCCCACGCTCTTTGAGCAACAGCTGGCCAGCGTACTAGGCCCAGCCCGAAAAGCCTTCCCCACATCCGTCATCGTCCAAT
XMRV	CTGTGATGCCCGATCAGTCCGTGTTTGAACTGTTAGACTCCCTACACAGACTCACCCATCTGAGCCCTCAAAAGATGAAGGCACTCCTCGACAGAGAAGAAAGCCCCTACTACATGTTAAACCGGGACAGAACTATCCAGTATGTGACTGAGACCTGCACCGCCTGTGCCCAAGTAAATGCCAGCAAAGCCAAAATTGGGGCAGGGGTGCGAGTACGCGGACAT
Rickettsia spp	AAAATGCTCTTAATAAGATATTTATCCTACATGCCGATCATGAGCAGAATGCTTCTACTTCAACAGTCCGAATTGCCGGCTCATCCGGAGCTAACCCTTTTGCTTGTATTAGCACGGGTATTGCCTCACTTTGGGGACCTGCTCACGGCGGGGCTAATGAAGCGGTAATAAATATGCTTAAAGAAATCGGTAGTTCTGAGTATATTCCTAAATATATAGCTAAA
Rickettsia spp	TACAATTCGCTCATAATACTTATTTAATAACAAGAACTACAAATGCTGCCGGTCAAGGTAAAATAATATTTAATCCTGTTGTAAATAATAATACAACTCTTGCAGCCGGTACAAATTTAGGTAGTGCTACAAATCCACTTGCAGAAATTAATTTTGGATCTAAAGGGGTTAATGTTGATACTGTATTAAATGTTGGTGAAGGTGTAAATTTATATGCTACTAAT
Anaplasma phagocytophilum	TGTAAAGGCGCCTGGTTTCGGTGACAGAAGAAAAGACATGCTTGGCGATATTGCTGTAATAGTAGGCGCTAAGTATGTAGTAAATGACGAGCTTGCTGTTAAGATGGAAGATATCGCTCTAAGCGATCTTGGTACTGCTAAGAGCGTGCGCATCACAAAAGACGCAACTACTATCATAGGTAGTGTTGATAGCAGTTCTGAAAGCATAGCTAGCAGGACTAATC
Ehrlichia ewingii (sparse)	TTTACCATTTCAAATTACTCATTTAAATATGAAGACAACCCATTTTTAGGTTTTGCTGGAGCCATTGGATATTCAATGGAAGGTCCAAGAATAGAACTTGAAGTATCTTACGAAACATTTAATGTAAAAAACCAAGACAACAGTTACAAAAATGATGCCCATATGTATTACCTTTTGGCACGAGAAGTTGATAGTTCTTCGCCAACAAAACCTCAAGTTAACAA
Ehrlichia chaffeensis	TCCAAGAATAGAGCTTGAAGTATCTTATGAGACATTTGATGTTAAAAATCAAGGTAACAACTATAAGAACGAAGCTCATAGATATTGTGCTTTATCCCATACAGTGCCGACAATAGCAGTGCAGGTAATAAATTTGTTTTTCTAAAAAATGAAGGACTACTTGACATATCATTTATGCTGAACGCATGCTATGATGTAATAAGTGAAGGAATACCTTTTTCTC
Borrelia afzelii	AAATGAAATAGAGAAAGCTATAAAAGAAGCTGAAGACGCTGGTGTAAAGACAGACGCGTTCACAGAAACACAAACAGGTGGCAAGGTGGCAGGCCCTAAAATAAGAGCAGCAAAAATACGCGTCGCTGACTTAACAATCAAATTCCTAGAAGCAACAGAAGAGGAAACTATTACATTTAAAGAAAATGGAGCGGGGGAAGATGAATTCTCAGGAATATACGATT
Borrelia burgdorferi	AAGTTTAAGGAGCTTGAAAAGATTATAGAAGAATACAAACCTATGTTTTTAAGTAAATTAATTGATGATTTTGCTATAGAATTAGACCAAGCTGTAGATAATGATGTGTCTAATGCCAGACATGTTGCTGATTCTTATAAAAAACTTAGAAAATCTGTTGTATTAGCCTACATTGAGAGTTTTGATGTTATATCTTCTAAGTTTGTTGATAGTAAGTTTGTTGA
Borrelia garinii	AAATATTTATTCCTCTTAAAAAGAATATTTTATCTGGAAAAATTGAGTCTGACATTGATATTGACAGTTTGGTTACAGATAAGGTTGTGGCAGCTCTTTTAAGCGAAAATGAAGCAGGTGTTAACTTTGCAAGAGATATTACAGATATTCAAGGCGAAACTCATAAAGCAGATCAAGATAAAATTGATATTGAATTAGATAATGTTCATGAAAGTGATTCCAAT
Mycobacterium tuberculosis	TTGCGTCAGCGGTACTCCCGGCGCGGACTTCCATCCCAGTCTGGACACGTCGGCAATCGAGGCGGTGTTCTACAAGGGTGCCTACACCGGAGCGTACAGCGGCTTCGAAGGAGTCGACGAGAACGGCACGCCACTGCTGAATTGGCTGCGGCAACGCGGCGTCGATGAGGTCGATGTGGTCGGTATTGCCACCGATCATTGTGTGCGCCAGACGGCCGAGGACG
Mycobacterium tuberculosis/kansasii	CGCAGTTCGAGGGCCAGACCAAGACCAAGTTGGGCAACACCGAGGTCAAATCGTTTGTGCAGAAGGTCTGTAACGAACAGCTGACCCACTGGTTTGAAGCCAACCCCACCGACGCGAAAGTCGTTGTGAACAAGGCTGTGTCCTCGGCGCAAGCCCGTATCGCGGCACGTAAGGCACGAGAGTTGGTGCGGCGTAAGAGCGCCACCGACATCGGTGGATTGCCC
Mycoplasma pneumoniae	TTGGGAACACGCGAGCGAGTGGTTCGGGGTCCAACACGACCAGTTCACCCGGTATCGGTTTTAAAATTCCCGAACAAAGTGGCACAAACACAACGTCGAAGGCTGTGCTGATCACCCCCGGGTTGGCTTGAACGCCGCAAGACGTTGGTAACCTCGTTGTCAGTGGCACCAGCTTGAGCTTCCAGCTCGGCGGGTGGCTGGTCACCTTCACGGACTTTATCAAA
Mycoplasma pneumoniae	CCCCAAGCAGCTTCCGTTGCTGATGTTTCGGAAGGTACTTCCGCTTCGCTATCGTTTGCGTGCCCTGATTGAAGTCCACCTTCTAGTAATGGTGAAAATCCGCTAGACAAATGCATTGCGGAAAAGATTGATAACTATAACCTACAATCCTTACCACAGTACGCTAGCAGTGTAAAGGAACTGGAAGATACACCAGTATACCTAAGGGGAATTAAAACGCAAAA
Neisseria meningitidis	TAACAGCGAATCTTACCACGCCGGCTTCAACTACAAAAACGGCGGCTTCTTCGTGCAATATGGCGGTGCCTATAAAAGACATCAGGATGTGGATGACGTGAAGATTGAAAAATACCAGATTCACCGTTTGGTCAGCGGTTACGACAATGATGCCCTGCACGCTTCCGTAGCCGTACAGCAACAAGATGCCAAATTGGTTGAAGACAATTATTCGCACAACTCTC
Neisseria spp	GAAAAATAACTGGAATGCCGCCTACAAAAAATCGGCGCGCATCGTCGGCGACGTCATCGGTAAATACCACCCCCACGGCGATTCCGCAGTTTACGACACCATCGTCCGTATGGCGCAAAATTTCGCTATGCGTTATGTGCTGATAGACGGACAGGGCAACTTCGGATCGGTGGACGGGCTTGCCGCCGCAGCCATGCGCTATACCGAAATCCGCATGGCGAAAA
Kingella kingae	AGTGCTAAAAAATCAATTGATACAGTAGAAAAACTTTTAAGCTTTACTCAAACTGGTGTAGCCGTTTCTGCTAAAAAATTAGATGAACTTTTGCAAAAATATTCTTCAAGTCAATTAGCAAAAAGCCTAGGCAGTTCAGCAAATATTGATTCTAAATTAACCAAAACCAATCACATTTTATCTACTTTAAGTTCTTTCTTAGGTACTGCTTTGGCTGGTATGGA
Kingella kingae	AACTTGGGAACTGCGTTTTGAACTGGCTAGCTAGAGTGTGTCAGAGGGGGGTAGAATTCCACGTGTAGCAGTGAAATGCGTAGAGATGTGGAGGAATACCGATGGCGAAGGCAGCCCCCTGGGATAACACTGACGTTCATGCTCGAAAGCGTGGGTAGCAAACAGGATTAGATACCCTGGTAGTCCACGCCCTAAACGATGTCAATTAGCTGTTGGGCAACTTG
Escherichia coli	ATGACACTGCTGCATTCAGCCGTCTCGGCGCGATGCTGGATCAAAAAAATCGTATCACCATTAACTACTTTGCCATGCCGCCCAGCACTTTTGGCGCAATTTGCAAAGGGCTTGGTGAGGCAAAACTGAATGCTAAACCGGCACGCGTAGTCATGGAGAAACCGCTGGGGACGTCGCTGGCGACCTCGCAGGAAATCAACGATCAGGTTGGCGAATACTTCGAG
Escherichia coli	TCGTGACAGCAAATAGGTGTAACCACGACCGTAAGAGGCTATCTGGCGCAGCAGGTCGTCATCGGCATTTGGCGGGCAGATGAAGATAGGTGCGACATTATGACGCAACGCGGCCTGGCGGAAGGGCGCGGACTCTTCAACTGGCACATCGGCAACCAGCACCGAATCGACGCCGACTTTCTCGCACTGGGCATAAAACTCATCAATGCCTTTGTTAAACACCA
Escherichia coli	TGATGGTTCAGGAGGCAGGGGCAGTACCAGCTTCTGCAACGTTGACTGAGCGAGAATTTAGCACTCCCGGTATTCCGATGAATGAGTATATCTGGAATACCGGAACCAATAGTCGTCCACAGGAGTTGTTTATATATTTCTCACGTGTTGATGCATTCGCTAACAGAGTAAATCTTGCGATTGTTTCAAACAGAAGAGCTGATGAGGTGATTGTATTACCTCCT
Escherichia coli	CCGAGAGCTTATCTGGAACTTGTCGACAAATAGCAGGCCACAGCAAGTATATATATATTTTTCTGCTGTTGATGCCCTTGGTGGAAGAGTCAATCTTGCTCTGGTTAGCAATCGGCAGGCCGATGAAGTGTTTGTTCTTCGCCCGGTAAGACAAGGTGGACGACCATTGCTTGGCATACGAATTGGTAATGATGCATTTTTCACTGCACATGCCATAGCTACGC
Escherichia coli	CTTACAATTGATGACGGTAATATTGAAATTGTTGGAACCGGAGTTAAAGGGAAGTTACCCACTGTATGGTTGCAATATGGTCAAGTTAATCTGAAAGCCAGCGGAGGTAACGGAAAATATACATGGCGCTCAGCAAATCCAGCAATTGCTTCGGTGGATGCTTCTTCTGGTCAGGTCACCTTAAAAGAGAAGGGAACTACAACTATTTCCGTTATCTCAAGTGA
Escherichia coli	TCCTGGCAAGGCCATTGTTAGTGCAAAAGTGAGTGGAGTAGGTACAGAAGTTAAGGCTACTACCGTTGAGTTTTTTGCCCCGTTGAGTATTGATGGTGATAAAGTGACCGTAATTGGTACTGGTATCACGGGGGCTCTGCCAAAGAACTGGTTACAGTATGGTCAGGTTAAGCTACAGGCAACAGGGGGCAATGGAAAATACACATGGAAATCCAGTAATACTA
Escherichia coli	ATACGAATAAAATGACTAAAATGTCCCCGGACGCGACTAAAAGCAACACGACCGATGACAAGGCTCTAAATTATGCGGCACAACAGGCCGCGAGCCTTGGTAGCCAGCTCCAGTCGCGCTCACTGAACGGCGATTACGCGAAAGATACCGCTCTTGGTATGGCCAGCAGCCAGGCTTCGTCACAGTTGCAGGCCTGGTTACAACATTATGGAACGGCAGAGGTT
Escherichia coli	GGAAAAGGGACACGTAGTTACATTCTCAACTGATTTAGGTAAATTGAATCTACAGACTGTAGCAACGGATAAAGATGGTTTCGCCTCGGTAACATTGACTTCTGATTCTGTCGGTAAAGCAGTTGTTAGTGCAAAAGTTAGTGAAGCTGGCTCAGTGGTTAATGCAGATGCAGTTAACTTCTTCGCTACACTTAGTATTGATAATAATGTCGAGATCGTTGGTA
Escherichia coli	GTTCTTCACAGAACTGAGTATCAATAAAAATGTAGAGGTTCTTGGTACAAAGGCTAGTGGTGAGTTACCTGATGTCTGGCTACAATATGGTCAGATTAAATTAAATGTTAATGGTGGCAATGATAAATACTCATGGAGCTCCAGTAATCCTAATATTGCGTCGATAGATGCCTCTTCCGGTATTATTACCTTAAAGGAAAAGGGGGAGGCTGTTATTAAGGTTG
Escherichia coli	CAATTGCTTCGGTGGATCCCTCTTCTGGTCAAGTCACATTAAAAGATAAGGGGGAAACAACAATTACCGTTGTATCTGGGGATAAACAAACGGCCATCTATACAATTGCTATGCCTAATAGCATAGTGAGCGTTAACTCAAGTGGTAGGGTTGATTATAATACAGCCAATAACATTTGCAAAAATATTAAAGGTTCGTTACCTTCTTCAATTAAAGAGCTGAAG
Escherichia coli	TGAACTGAAAATTGACAACAAGGTTGATATTATTGGTAACAATGTYASTGGYGACTTRCCTAATATCTGGTTGCAATATGGTCAGTTTAAACTGAAGGYAAGCGGTGGTAATGGTACATATTCATGGYATTCAGARAATACCARTATYGCGACTGTTGATGMATCAGGGAAAGTMACCTTGAATGGTAAAGGYASTGYMGTAATTAAWGYCACATCTGGTGATA
Escherichia coli	TCAGTCAGAGGTTGACATATATAACAGAATTCGGGATGAATTATGAATAAAGTAAAATGTTATGTTTTATTTACGGCGTTACTATCCTCTCTATATGCACACGGAGCTCCCCAGWCTATTACAGAACTATGTTCGGAATATCGCAACACACAAATATATACGATAAATGACAAGATACTATCATATACGGAATCGATGGCAGGCAAAAGAGAAATGGTTATCAT
Escherichia coli	ATGATGCAACTCACAAAAAAAAATAAAAAAATTGCAAAATCCGTTTAACTAATCTCAAATATCCGTGAAACAACATGACGGGAGGTAACATGAAAAAGCTAATGTTGGCAATTTTTATTTCTGTATTATCTTTCCCCTCTTTTAGTCAGTCAACTGAATCACTTGACTCTTCAAAAGAGAAAATTACATTAGAGACTAAAAAGTGTGATGTTGTAAAAAACAAC
Escherichia coli	CCCACTGGTATAAGTTTTATTGCTTATAGCAATAAGGTTGAGGTGATTTTATGAAAAAGAATATCGCATTTCTTCTTGCATCTATGTTCGTTTTTTCTATTGCTACAAATGCCTATGCATCTACACAATCAAATAAAAAAGATCTGTGTGAACATTATAGACAAATAGCCAAGGAAAGTTGTAAAAAAGGTTTTTTAGGGGTTAGAGATGGTACTGCTGGAGCA
Escherichia coli	TCGCCGAAAAAGATAATATTACTATGCTCTTCGTAGCGGAGAGTATAGTATGATGTTCATCACAAAAAAAATAAAAAAGTTTGCGCAACCGTTCTGATTTTGATTCAAATGTTCGTGGATGCCATGTTCCGGAGGTAATATGAAGAAATCAATATTATTTATTTTTCTTTCTGTATTGTCTTTTTCACCTTTCGCTCAGGATGCTAAACCAGTAGAGTCTTCAA
Escherichia coli	TTGCAGGGATCAGTCGTACGGGGATGCAGATAAATCGCCATTCGTTGACTACTTCTTATCTGGATTTAATGTCGCATAGTGGAACCTCACTGACGCAGTCTGTGGCAAGAGCGATGTTACGGTTTGTTACTGTGACAGCTGAAGCTTTACGTTTTCGGCAAATACAGAGGGGATTTCGTACAACACTGGATGATCTCAGTGGGCGTTCTTATGTAATGACTGCT
Escherichia coli	GGGAAGAATAAGTAATGTTCTTCCAGAGTACAGAGGAGAGGAAGGGGTAAGAATCGGTAGGATATCTTTTAATAGTCTTTCTGCGATTCTCGGAAGTGTTGCGGTCATCCTTAATTGCCACTCAACCGGAAGTTATTCAGTTCGTTCCGTGAGCCAAAAACAGAAAACAGAATGCCAGATTGTTGGAGACAGGGCGGCCATTAAAGTAAATAATGTTTTGTGGG
Escherichia coli	TACGGCAACAAATACTTTCTACCGTTTTTCAGATTTTACACATATATCAGTGCCCGGTGTGACAACGGTTTCCATGACAACGGACAGCAGTTATACCACTCTGCAACGTGTCGCAGCGCTGGAACGTTCCGGAATGCAAATCAGTCGTCACTCACTGGTTTCATCATATCTGGCGTTAATGGAGTTCAGTGGTAATACAATGACCAGAGATGCATCCAGAGCAG
Klebsiella oxytoca	AGCAACCGGTATCTTCCTGACCGACGAAACCGCTCGTAAACACATCACCGCTGGCGCGAAAAAAGTCGTACTGACTGGCCCGTCCAAAGACAACACTCCGATGTTTGTTAAAGGCGCTAACTTTGACAAATACGAAGGCCAGGACATCGTTTCCAACGCATCCTGCACCACCAACTGCCTGGCTCCGCTGGCAAAAGTTATCAACGACAACTTCGGCATCATCG
Klebsiella pneumoniae	AGTGAACTGCTCGGCGGAGAACGGGGGATGGCGCGAAAAATTCATCCCAATGACGATGTGAATAAGAGCCAGAGCTCAAATGATGTATTCCCCACCGCCATGCACGTCGCGGCGCTGATTGCCCTGCGGGAAAAAGTGATCCCGTCGCTGCAGGCGCTGCGGGCGACGCTCAATGAAAAAGCGGTGGCCTTCAGGGATATCGTCAAGATCGGCCGCACCCATCT
Listeria monocytogenes	GTGGAGAAAGCGCGTTTAGACCGAATTTTAGCTAACGAAGAAATTCGAACTATTTTTACGGCTATGGGAACTGGTTTTGGTGGAGATTTCGATGTTTCTAAATCTCGTTACCACAAATTAATTATTATGACTGATGCCGATGTTGATGGTGCACATATTCGTACACTACTTCTTACGCTATTTTATCGTTATATGCGCCCACTGCTTGATGCTGGTTATATCTA
Salmonella enteritidis	CTGTCATTCCTGAACTCAGGCGTCTCCATCCGCCTGCGCGACAAGCGCGATGGCAAAGAAGATCATTTCCACTACGAAGGCGGCATCAAGGCGTTTGTTGAATATCTGAACAAGAATAAAACGCCGATCCACCCGAATATCTTCTACTTCTCCACCGAAAAAGACGGTATCGGCGTGGAAGTAGCGCTGCAGTGGAACGATGGTTTCCAGGAAAACATCTACTG
Serratia marcescens	TGAAGACCACTTCCATTACGAAGGCGGCATCAAGGCGTTTGTCGAGTACCTGAACAAGAACAAAACSCCGATCCACCCGAACGTGTTCTACTTCTCCACCGTGAAAGACGACATCGGCGTGGAAGTGGCGCTGCAGTGGAACGACGGTTTCCAGGAAAACATCTACTGCTTCACCAACAACATTCCGCAGCGCGACGGCGGCACGCACCTGGTCGGTTTCCGTA
Shigella spp	TCGTTCCTCAACTCCGGCGTTTCCATTCGTCTGCGCGACAAGCGTGACGGCAAAGAAGACCACTTCCACTATGAAGGCGGCATCAAGGCGTTCGTTGAATATCTGAACAAGAACAAAACGCCGATCCACCCGAATATCTTCTACTTCTCCACCGAAAAAGACGGTATTGGCGTCGAAGTGGCGTTGCAGTGGAACGATGGCTTCCAGGAAAACATCTACTGCTT
Elizabethkingia meningoseptica	TTTATACGGAGACTTGGTTGGCCAAAGGAAGAGAATACAGTGTAGACTTTGATATTGTATATGGTACACCGGATTATAAATATTCGGCAGTAGTACCTGTAATCCAATATAACAAATCATCCATTGATGGTGTTCCTTATGGTAAAGCACATACACTGGGATTAAAAAAGAATATTCAGTTACCAACAAACACGGAAAAAGCTTATCTTAGAACTACTATTTCC
Elizabethkingia meningoseptica	AAGAGAAGATTATCTGCACTAGGGCCTGGTGGTTTATCAMGAGAAAGAGCAGGTTTCGAGGTTCGAGATGTTCACCATACWCACTACGGTAGAATTTGTCCGATCGAAACTCCGGAAGGACCAAACATTGGTTTGATCTCYTCTTTAGGTATCTATGCTAAGATYAAYAACCTTGGTTTCATCGAAACTCCATATAGAAAAGTAGAAAATGGTAAAGTAGAYTT
Haemophilus influenzae	AATTTAAACCTGTAGCTGAGAAATTAGCAGCAAGCAAAAAAGAAGTTGATGATAAAATTGCTGCTGCTCGTAAAAAAGTAGAAGCAAAAGTTGCGGCTTTAGAAAAAGATGCACCTCGCTTACGTCAAGCTGATATTCAAAAACGCCAAGAGGAAATTAATAAATTAGGTGCGGCTGAAGATGCTGAATTACAAAAATTAATGCAAGAACAAGATAAAAAAGTT
Haemophilus influenzae	TCGTATTGCTCAAGCTGACTGCGCAAATGGTTTCTTGTTAGATGGTTTCCCTCGTACTATTCCACAAGCGGATGCACTGAAAGATTCAGGTGTTAAAATTGACTTTGTTTTAGAATTTGATGTGCCAGACGAAGTGATTGTTGAACGTATGAGTGGCCGTCGCGTACACCAAGCGTCTGGTCGTTCTTACCACATCGTTTATAATCCACCAAAAGTGGAAGGTA
Streptococcus pyogenes	GCTGCCCTTGGTGAACGTTGGGTAGGTGCTGGTGAAAATAACCCAGATGTCGTCTTCATGACACTTGGAACAGGTGTCGGTGGAGGCATTATTGCTGATGGTAACTTGATTCATGGTGTTGCAGGAGCAGGTGGTGAAATCGGCCACATGATTGTTGAGCCAGAAAATGGCTTTGCTTGTACTTGTGGCTCACACGGCTGTTTGGAAACAGTAGCTTCAGCAAC
Streptococcus pyogenes	GCGGAAGAGAATCTAACGTTCAAAAAATGGCGATTTCAGAATTGATGGCTGATGTTGGTATTTCAGTAGACATGGATTATGGTCCATCTAGTGGTTCTGCAGGTAGCTCTCGTGTTCAAAGAGCCTTGAAAGAAAACTTTGGCTACAACCAATCTGTTCACCAAATCAACCGTAGCGACTTTAGCAAACAAGATTGGGAAGCACAAATTGACAAAGAATTATCT
Streptococcus agalactiae	AAGGTGTTTTCTTACGTAATTTCAATAATTTAAGAGCCAAAGTCTATCGTGCAGATGATGTTAATTTACAAAAACCACTATGGGTAAGTGCTCCCCAAGCAGGAGATAAAAATTACTACAGCGGAAATACTGAAAATCCAAAATCTACATTTTTATATGACACAGAATGGAAAGGAACCACTACTGATGGTATTCCTTTAGAAGATGGAAAATACAAATACGTT
Streptococcus agalactiae	TTATCGGTGATACTGACTTATCAGGAACAACAGTTCACTTTACGCCTGACCCAGAAATTTTCACTGAAACCACTGTATTTGATTTTGATAAATTAGCCAAACGTATTCAGGAATTAGCTTTTTTAAATCGTGGACTAAGAATCTCCATTTCAGACAAGCGAGAAGGTCAAGAAGTTGAAAAAGAATATCACTATGAAGGTGGTATAGGTTCATACGTTGAGTTT
Streptococcus pneumoniae	CTGCCAAAGGGCTACCAGTAGTCAATCTCTTGAAATTGGATGAAGACGAAAGTATTCAGACGGTTATCAATGTTGAGTCTGATCGCAGTGATGATGCTTATCTCTTCTTTACAACCCGTCACGGTATTGTGAAGAGAACCAGTGTTAAGGAGTTTGCCAATATTCGTCAAAATGGTCTCAAAGCGCTGAATTTAAAGGATGAAGATGAGTTAATCAATGTCTTG
Streptococcus pneumoniae	TTGGTTCTGACTTTGAAAAGACAGGGAATTCTCTTGATATTGATTTTAACTCTGTCCATTCAGGCGAAAAGCAGATTCAGATTGTTAATTTTAAGCAGATTTATTATACAGTCAGCGTAGATGCTGTTAAAAATCCAGGAGATGTGTTTCAAGATACTGTAACGGTAGAGGATTTAAAACAGAGAGGAATTTCTGCAGAGCGTCCTTTGGTCTATATTTCGAGT
Streptococcus dysgalactiae	TGTGGGCAATGACGGTGTCATTACCATCGAAGAATCACGTGGTATGGAGACAGAGCTTGAAGTGGTAGAAGGCATGCAGTTTGACCGTGGTTACCTGTCTCAATACATGGTCACAGACAATGAAAAAATGGTTGCAGACCTTGAGAACCCATTTATCTTGATTACTGACAAAAAAGTGTCAAACATCCAAGACATTCTCCCATTGCTTGAGGAAGTTCTCAAAA
Streptococcus dysgalactiae	CACCCACATGGGGATTCCTCTATTTATGATGCCATGGTACGGATGAGTCAAAATTGGAAAAACCGTGAAATTCTTGTGGAAATGCACGGAAATAATGGTTCAATGGATGGTGATCCGCCTGCGGCTATGCGTTATACAGAAGCTCGCTTGTCTGAAATTGCGGGTTATCTTCTTCAAGACATTGAAAAAAATACGGTTCCCTTTGCTTGGAACTTTGATGACAC
Staphylococcus aureus	AAAAAAGAATTAGATGGCTTTAATATCACAATTCCTCATAAAGAACGTATCATACCGTATTTAGATCATGTTGATGAACAAGCGATTAATGCAGGTGCAGTTAACACTGTTTTGATAAAAGATGGCAAGTGGATAGGGTATAATACAGATGGTATTGGTTATGTTAAAGGATTGCACAGCGTTTATCCAGATTTAGAAAATGCATACATTTTAATTTTGGGCGC
Staphylococcus aureus	GATTATGAAAGAAGAAAAAGATAGACTTTCTGGTGAAGATACACGTGAAGGTATGACAGCAATTATATCTATCAAACATGGTGATCCTCAATTCGAAGGTCAAACGAAGACAAAATTAGGTAATTCTGAAGTGCGTCAAGTTGTAGATAAATTATTCTCAGAGCACTTTGAACGATTTTTATATGAAAATCCACAAGTCGCACGTACAGTGGTTGAAAAAGGTA
Staphylococcus aureus	TTCAGGATCGTAAAATAAAAAAAGTATCTAAAAATAAAAAACGAGTAGATGCTCAATATAAAATTAAAACAAACTACGGTAACATTGATCGCAACGTTCAATTTAATTTTGTTAAAGAAGATGGTATGTGGAAGTTAGATTGGGATCATAGCGTCATTATTCCAGGAATGCAGAAAGACCAAAGCATACATATTGAAAATTTAAAATCAGAACGTGGTAAAATT
Staphylococcus aureus	ATTTTATTAAAGATAAAAGTTATGATAAAGATACATTAATACTCAAAGCTGCTGGAAACATTTATTCTGGCTATACAAAGCCAAATCCAAAAGACACTATTAGTTCTCAATTTTATTGGGGTTCTAAGTACAACATTTCAATTAATTCAGATTCTAATGACTCAGTAAACGTTGTAGATTATGCACCTAAAAATCAAAATGAAGAATTTCAAGTACAACAAACG
Staphylococcus aureus	TGTAACGTTACATGATAATAATCGATTGACCGAAGAGAAAAAAGTGCCGATCAATTTATGGCTAGACGGTAAACAAAATACAGTACCTTTGGAAACGGTTAAAACGAATAAGAAAAATGTAACTGTTCAGGAGTTGGATCTTCAAGCAAGACGTTATTTACAGGAAAAATATAATTTATATAACTCTGATGTTTTTGATGGGAAGGTTCAGAGGGGATTAATCG
Staphylococcus aureus	GCAATAAACGTTAAATCTATAGATCAATTTCTATACTTTGACTTAATATATTCTATTAAGGACACTAAGTTAGGGAATTATGATAATGTTCGAGTCGAATTTAAAAACAAAGATTTAGCTGATAAATACAAAGATAAATACGTAGATGTGTTTGGAGCTAATTATTATTATCAATGTTATTTTTCTAAAAAAACGAATGATATTAATTCACATCAAACTGACAA
Staphylococcus aureus	ATGACAAAGTGAAAACAGAGTTATTAAATGAAGATTTAGCAAAGAAGTACAAAGATGAAGTAGTTGATGTGTATGGATCAAATTACTATGTAAACTGCTATTTTTCATCCAAAGATAATGTAGGTAAAGTTACAGGTGGTAAAACTTGTATGTATGGAGGAATAACAAAACATGAAGGAAACCACTTTGATAATGGGAACTTACAAAATGTACTTATAAGAGTT
Staphylococcus aureus	AAATATCTGATTACTATCCAAGAAATTCGATTGATACAAAAGAGTATATGAGTACTTTAACTTATGGATTCAACGGTAATGTTACTGGTGATGATACAGGAAAAATTGGCGGCCTTATTGGTGCAAATGTTTCGATTGGTCATACACTGAAATATGTTCAACCTGATTTCAAAACAATTTTAGAGAGCCCAACTGATAAAAAAGTAGGCTGGAAAGTGATATTT
Staphylococcus aureus	GGAAAAAGTTGACTTAAACACAAAAAGAACTAAAAAAAGCCAACATACTAGCGAAGGAACTTATATCCATTTCCAAATAAGTGGCGTTACAAATACTGAAAAATTACCTACTCCAATAGAACTACCTTTAAAAGTTAAGGTTCATGGTAAAGATAGCCCCTTAAAGTATTGGCCAAAGTTCGATAAAAAACAATTAGCTATATCAACTTTAGACTTTGAAATTC
Angiostrongyliasis vasorum	TTTGATGTTATATGTATTGTGTTTTGTGATGAGGTTGAAGGAGGATAGTTTGAATAAGGTGAATTCTTTTGAGAGGGGGTTTTTGGGTTTGGTGAAGATTCAGAATTCTTTTAGGATTCATTTTTTTGTGGTGATGTTGATGTTTGTTATTTTTGATTTGGAGATTGTGATGTTTTTGGGTTTGTTAGTTTCGGATATTTCTTCTTTCTTTGGTTTTATATTGT
Angiostrongyliasis cantonensis	ATGTGCCACCTGATTAACAACAGGGAATCTTAATGACCCAAGCATAATATATGTGAATGGGCGCCAACATAGCAAAAACAGAATTCCTATATGTGAGAATGTGAAAAAGTGACAATATACACGTATTCATATGTATATATGTGTATGTGTGTATGGAAATTGATATACTAGCTTCAGCGATGGATCGGTCGATTCGCGTATCGATGAAAAACGCAGCTAGCTGT
Cryptococcus spp	TGCTTTGTGATACATTTTCAACGAGTCGAGTTGTTTGGGAATGCAGCTCAAAATGGGTGGTAAATTCCATCTAAAGCTAAATATTGGCGAGAGACCGATAGCGAACAAGTACCGTGAGGGAAAGATGAAAAGCACTTTGGAAAGAGAGTTAAACAGTATGTGAAATTGTTGAAAGGGAAACGATTGAAGTCAGTCGTGCTCTTTGGATTCAGCCGGTTCTGCCG
Cryptococcus spp	AGACCGATAGCGAACAAGTACCGTGAGGGAAAGATGAAAAGCACTTTGGAAAGAGAGTTAAACAGTACGTGAAATTGTTGAAAGGGAAACGATTGAAGTCAGTCATGCTCTTGGGATTTATATCATTCTGCGGTGTATTTCCCTTGAGTGGGGTCAACATCAGTTTTGATCGATGGATAAAGGCACGAGGAAGGTAGCACTCTCGGGTGAACTTATAGCCTC
Echinococcus canadensis	TATTTATGGTAGATATTATAGAGTTAGTTATAGTATGCTTTCTGTGTTATGATTTTTAGCTGCTTCTAGAATTTCTAGGTATTCCTTGTTGTGTACTGGTTGGGGTAGTTACAATAGTTATTCTTTTTTAAGGTCGGTTCGATGTGCTTTTGGATCTGTTAGGTTTGAGGCTTGTTTTATGTGTGTGGTTATTTTTTGCGCTTTATGCTGTTGTGGGTATAATT
Echinococcus granulosus	TAACAAGGTTGGTGTAATTGGTTTGTTGCAGAGGTTTGCTGATCTATTGAAGTTGGTAATTAAGTTTAAGTGTTTTTACTTCCAAAGTCGTAGGTATGTTGGTTTGTTTGGTGTTGTGTTATTAATGGCTTTGGTGATTGTTTATTCATTTATTTATGGTAGATATTATAGAGCTAGTTATAGAGGCCTCTCCGTGTTGTGGTTTTTGGCTGCCGCCAGAACAT
Echinococcus multiocular	TGCTGCTATTACTATGCTTTTGTTTGATCGTAAATTTTGTTCTGCTTTTTTTGATCCGTTAGGTGGTGGTGATCCTATTCTATTTCAGCATATGTTTTGGTTTTTTGGTCATCCGGAGGTTTATGTTTTGATTCTGCCTGGATTTGGTATAATTAGTCATATTTGTTTAAGTATAAGTGGTAATTTTGATGCGTTTGGGTTTTATGGTTTGTTGTTTGCTATGT
Spirometra erinaceieuropaei	ATGATACTTTTGGTTTTTATGGTTTACTGTTTGCTATGTTTTCTATAGTGTGTTTAGGTAGCGTGGTTTGGGGCCACCACATGTTTACTGTGGGGTTGGATGTGAAGACTGCTGTTTTCTTTAGTTCTGTGACCATGATTATTGGGGTTCCCACGGGTATAAAGGTGTTTTCTTGGCTTTATATGATTTTAAATAGTCGTGTTTCGTTGCGTGAGCCTGTGTTT
Taenia asiatica	TGTGTTAGCAGCTGCTATTACTATGCTTTTATTTGATCGTAAATTTAGTTCTGCGTTTTTTGATCCGTTAGGTGGTGGTGATCCTGTTTTATTTCAACATATGTTTTGATTTTTTGGTCATCCGGAGGTTTATGTTTTAATTATTCCTGGTTTTGGTATGATTAGTCATATATGTTTAAGAATAAGTATGTGTCCGGATGCTTTTGGTTTTTATGGTTTGTTAT
Taenia multiceps	AGATGCTTTTGGTTTTTATGGTTTATTATTTGCTATGTTTTCAATAGTGTGTTTAGGGAGAAGTGTGTGAGGTCATCATATGTTTACAGTTGGGTTAGATGTTAAGACTGCTGTATTTTTTAGTTCGGTTACTATGATAATAGGAGTGCCCACAGGAATAAAGGTTTTTACTTGGCTTTATATGCTTTTAAATTCTCGTGTAAACAAGAGTGATCCTATACTAT
Taenia saginata	CATTATTTTCAAGTAGTAATGGTGTGGATTTCTTGATGTTTTCGTTGCATTTGGCGGGTGCGTCTAGAATTTTTAGTTCTATTAATTTTATTTGTACTTTGTATAGAATATTTATGACTAATATATTTTCTCGTACTTCTATAATATTGTGGGCTTATTTATTTACGTCTATTTTATTATTAGTTACTCTTCCTGTATTAGCAGCTGCTATCACTATGCTTTTA
Taenia solium	TGTTTAGGCGCTGGTATAGGGTGGACTTTTTACCCACCTTTATCATCTTCGTTGTTTTCAAGAGGAAGTGGGGTAGATTTTTTAATGTTTTCTTTGCATTTAGCTGGTGTATCAAGTATTTTTAGTTCTATTAATTTTATATGTACATTATATAGAGTTTTTATGACTAATATATTTTCTCGTACATCTATAGTGTTATGATCTTATTTATTTACATCTATCTT
Paragonimus skrjabani	ATTGGTTTTTGCTATGGGGGCTATTGTTTGTCTAGGAAGGGTTGTTTGGGCGCATCATATGTTTATGGTTGGTCTGGATGTTAAGACTGCTGTGTTTTTTAGCTCTGTTACCGGGGTTATAGGTATCCCTACAGGAATTAAGGTTTTTTCTTGGTTGTTTATGTTGGGAGGGGCTCGTTTACGGTTTTGGGATCCGGTAATTTGGTGAATTTTGGGGTTTATTT
Paragonimus westermani	CGGGCTGGTGTTTGCGATGGGGGCCATTGTGTGTCTGGGTAGTGTTGTGTGGGCGCATCACATGTTCATGGTTGGTTTGGATGTCAAGACTGCTGTTTTCTTTAGTTCTGTCACGGGAGTGATTGGGATACCCACGGGGATTAAGGTTTTCTCCTGGTTGTTCATGCTGGGTGGAACTCGTTTGCGGTTTTGGGATCCTGTTTTGTGGTGAATTCTTGGGTTTA
Schistosoma haematobium	TTGACTGCTATATTTTTTAGTTCAGTGACTATGATTATAGGGATTCCTACAGGTATAAAGGTTTTTTCTTGATTATATATGCTTAAAAGCTGTGGGTCTCGTGTATGAGATCCTATAGTTTGATGATTGGTTGGTTTTATATTTTTATTTACGATAGGTGGTGTTACTGGTATAGCTTTATCAGCTTCTTCATTAGATATATTATTTCATGATACTTGATTTGT
Schistosoma intercalatum	TTGTGGTGTTGGTTGGACACTGTACCCTCCTTTATCTATATCTGAGAATTCGGGTTTAGGTGTAGACTATTTAATGTTTTCTTTACATTTAGCTGGTGTTTCTAGATTGATTGGTTCAATTAATTTTATTTCTACAATTGTTAGTTGTGTAGATTTGAAGACTTCTATTATAATTTGGTCATATTTGTTTACTTCAATTTTGTTATTACTTTCTTTGCCAGTAT
Schistosoma japonicum	TTCGGTGTTGTTATTGTTATCGTTGCCGGTTCTTGCTGCAGGTATAACTATGTTGTTGTTTGATCGTAAATTTGGTACTGCTTTTTTTGAGCCAGCAGGTGGTGGTGATCCTGTGTTATTTCAACATTTATTTTGGTTTTTTGGTCACCCAGAAGTATATGTTTTGATATTGCCTGGATTTGGTATAGTAAGTCATATATGTATGTCTTTAAGTAATAATAATT
Schistosoma mansoni	TTCTATTACTATGATAATAGGTGTTCCTACTGGTATTAAGGTGTTTTCATGACTTTATATGTTGAATAGTTGTGGTATGCGGGTTTTGGATCCCATAGTATGGTGATTAGTCGGTTTTATATTTTTATTTACGGTTGGTGGTGTCACAGGGGTGGCTTTATCTGCATCTGCTTTAGATATACTATTTCATGATACTTGATTTGTTGTTGCTCATTTTCATTATG
Schistosoma mekongi	TGAAATTTATAACTACAATAATGATACGTTTAAATTCTTGTTCTTCAGTTATAAGTTGATCTTATTTTTTTACTTCTATACTTTTGTTAATATCATTGCCTGTACTTGCTGCTGGGATAACTATGTTATTGTTTGATCGTAAATTTGGTACTGCTTTTTTTGAGCCAGCCGGTGGTGGTGATCCTGTGTTATTTCAACATTTATTTTGATTTTTTGGTCATCCT
Trichinella britovi	GGACCACTCGGAATAATTTATGCAATAACAAGAATCGGCATCCTAGGATGTTTTGTATGAGGTCACCACATATACACAGTTGGTATAGATATCGATACACGAGCTTACTTCACTGCTGCTACAATAATCATTGGTATCCCAACCGGCGTAAAAATCTTTAGATGATTAGCTACACTATACGGTACACACATCAAAATAACACCAGCCATATTATGAGTACTAGG
Trichinella nativa	AATGATTTACGCAATAACAAGAATTGGTATCCTGGGATGTTTCGTATGAGGCCACCACATATACACAGTTGGCATAGATATCGATACACGAGCTTACTTCACTGCTGCCACAATAATCATTGGTATTCCAACCGGTGTAAAAATCTTTAGATGATTAGCTACACTATACGGTACACACATCAAAATAACACCAGCCATACTATGAGTACTAGGATTTCTCTTAC
Trichinella nelsoni	ATTTGGACCACTTGGAATAATCTATGCAATAACAAGAATCGGTATTTTAGGATGTTTCGTATGAGGTCACCACATATACACAGTTGGCATAGATATCGACACACGAGCTTACTTCACTGCCGCCACAATAATCATTGGTATCCCAACCGGTGTAAAAATCTTTAGATGATTAGCTACGCTATACGGCGCACACATTAAAATAACACCAGCTATACTATGAGTAC
Trichinella papue	TTAAAGTGTTTGGTCCACTCGGAATAATCTATGCCATAACAAGAATTGGCATTTTAGGATGCTTTGTATGAGGTCACCACATATATACGGTTGGCATGGACATTGACACACGAGCTTACTTCACCGCCGCCACAATAATCATTGGTATCCCAACTGGTGTAAAAATCTTCAGATGACTAGCCACACTATACGGTGCTCACATCAAAAGAACACCAGTTATATTA
Trichinella pseudospiralis	ATATCCGGAAAATTCAAGGTATTCGGCCCACTCGGAATAATCTATGCAATAATAAGAATTGGCATCCTAGGATGCTTTGTATGAGGCCACCACATATATACAGTTGGCATAGACATCGACACACGAGCTTACTTCACCGCCGCTACAATAATCATTGGTATTCCAACCGGCGTAAAAATCTTCAGATGACTAGCTACATTATATGGCAGCCATATCAAAATAAC
Trichinella spiralis (sp.)	AACATTCAACCATTATTAGTACGAAAGGAACATAATACCTAATAACCATTATGAAAAAATTCAAACTACCTAGTACAAAAACCACAATTACCTTACTAATCACACTACTAACAATATTCACACTAACCAAAGCCAAACCATCCTATGAATTAAGCATAAACAACAACTACATAGCAATATCAGGCTTAGATAGATCTAACCCCATCCCATTAACATCAACACTC
Trichinella zimbabwensis	GAAGCAYTAATATTYATATCMGGAAAATTTAAAGTATTTGGWCCACTCGGAATRATYTAYGCWATAACAAGAATTGGTATYYTRGGATGYTTCGTATGAGGYCACCACATATACACAGTYGGCATAGAYATYGACACACGAGCTTACTTYACYGCYGCYACAATAATCATTGGTATTCCAACYGGTGTAAAAATCTTYAGATGAYTAGCYACAYTATACGGYRC
Trypanosoma brucei	TCTCTCTACCGTTTCGGTTCCATCACGGAGAGCAAAGTCATCAGCCGCTGCCTTTTTCTTGAAACTGTTGCCGGTGTCCCGGGGATGGTCGGTGGAATGTTGCGCCACCTTTCATCATTGCGGTACATGACGCGCGACAAGGGTTGGATTAACACTCTTCTTGTTGAAGCAGAGAATGAGCGCATGCACCTCATGACGTTCATTGAACTTCGCCAGCCAGGGCT
Trypanosoma cruzi	TTTGTGAGATTTTGATTTAGGTTTTGTAATTAGAAGTATTCATATTTGTTTCACTTCCTTATTATATTTTTTATTATATGTGCATATATTTAAATGTATAATATTGGTAATTTTATTTGACACACATTTATTAGTGTGATTTGTAGGATTTGTATTATTTATGTTTATAATAATTATTGCATTTATTGGATATGTGTTACCATGTACAATGATGTCTTATTGAG
